# Supplementary material for: An efficient lactamisation/N-acyliminium Pictet–Spengler domino strategy for the diasteroselective synthesis of polyhydroxylated quinoxalinone, β-carboline and quinazolinone derivatives
Source: Royal Society of Chemistry journal article supplement (doi:10.1039/c6ob00250a), 2016-01-01
Supplement: c6ob00250a1.pdf [file c6ob00250a1.pdf]

Supplementary Material (ESI) for Organic & Biomolecular Chemistry

This journal is (c) The Royal Society of Chemistry 2011

**An efficient lactamisation/*N*-acyliminium Pictet–Spengler domino strategy for the diastereoselective synthesis of polyhydroxylated quinoxalinone,  $\beta$ -carboline, and quinazolinone derivatives**

B. V. Subba Reddy,<sup>a,\*</sup> B. Phaneendra Reddy,<sup>a,b</sup> P. Vasu Govardhna Reddy,<sup>b</sup> A. Siriwardena<sup>c</sup>

<sup>a</sup>Centre for Semiochemicals, CSIR-Indian Institute of Chemical Technology, Hyderabad 500 007.<sup>b</sup>Department of Chemistry, Yogi Vemana University, Kadapa, 516003.

<sup>c</sup>Laboratoire de Glycochimie, des Antimicrobiens et des Agroressources UMR 7378 CNRS, 33 rue Saint-Leu 80037 Amiens.

E-mail: basireddy@iict.res.in; Fax: (+)91 40 27160512; aloysius.siriwardena@u-picardie.fr

**Table of Contents**

1. Copies of <sup>1</sup>H and <sup>13</sup>C NMR spectra of products (3a-i).....S2-S19
2. Copies of COSY, TOCSY, NOESY.....S20-S22

# 1. Copies of $^1\text{H}$ & $^{13}\text{C}$ NMR spectra of products (3a-i)

$^1\text{H}$  NMR of Product **3a** (Table 2, entry **a**)

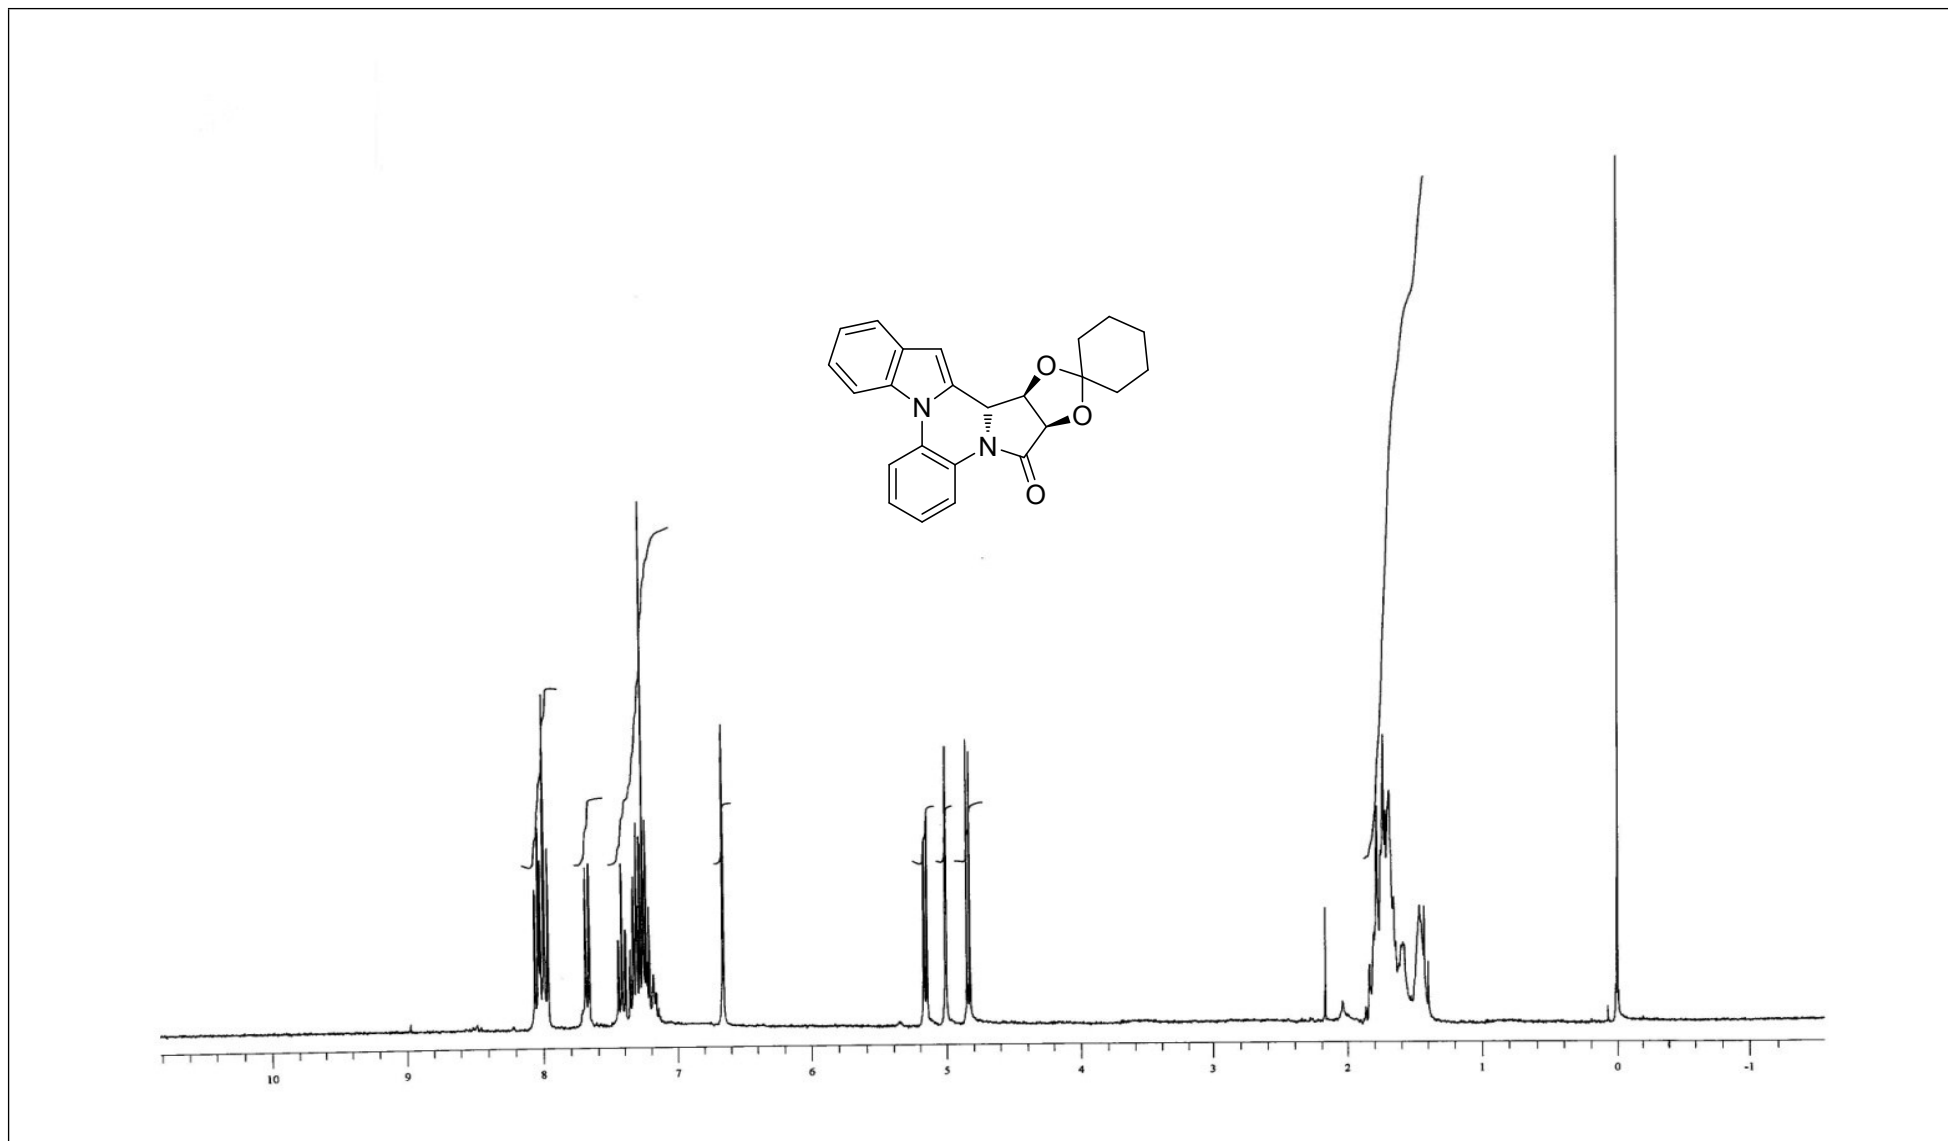

<sup>13</sup>C NMR of Product 3a (Table 2, entry a)

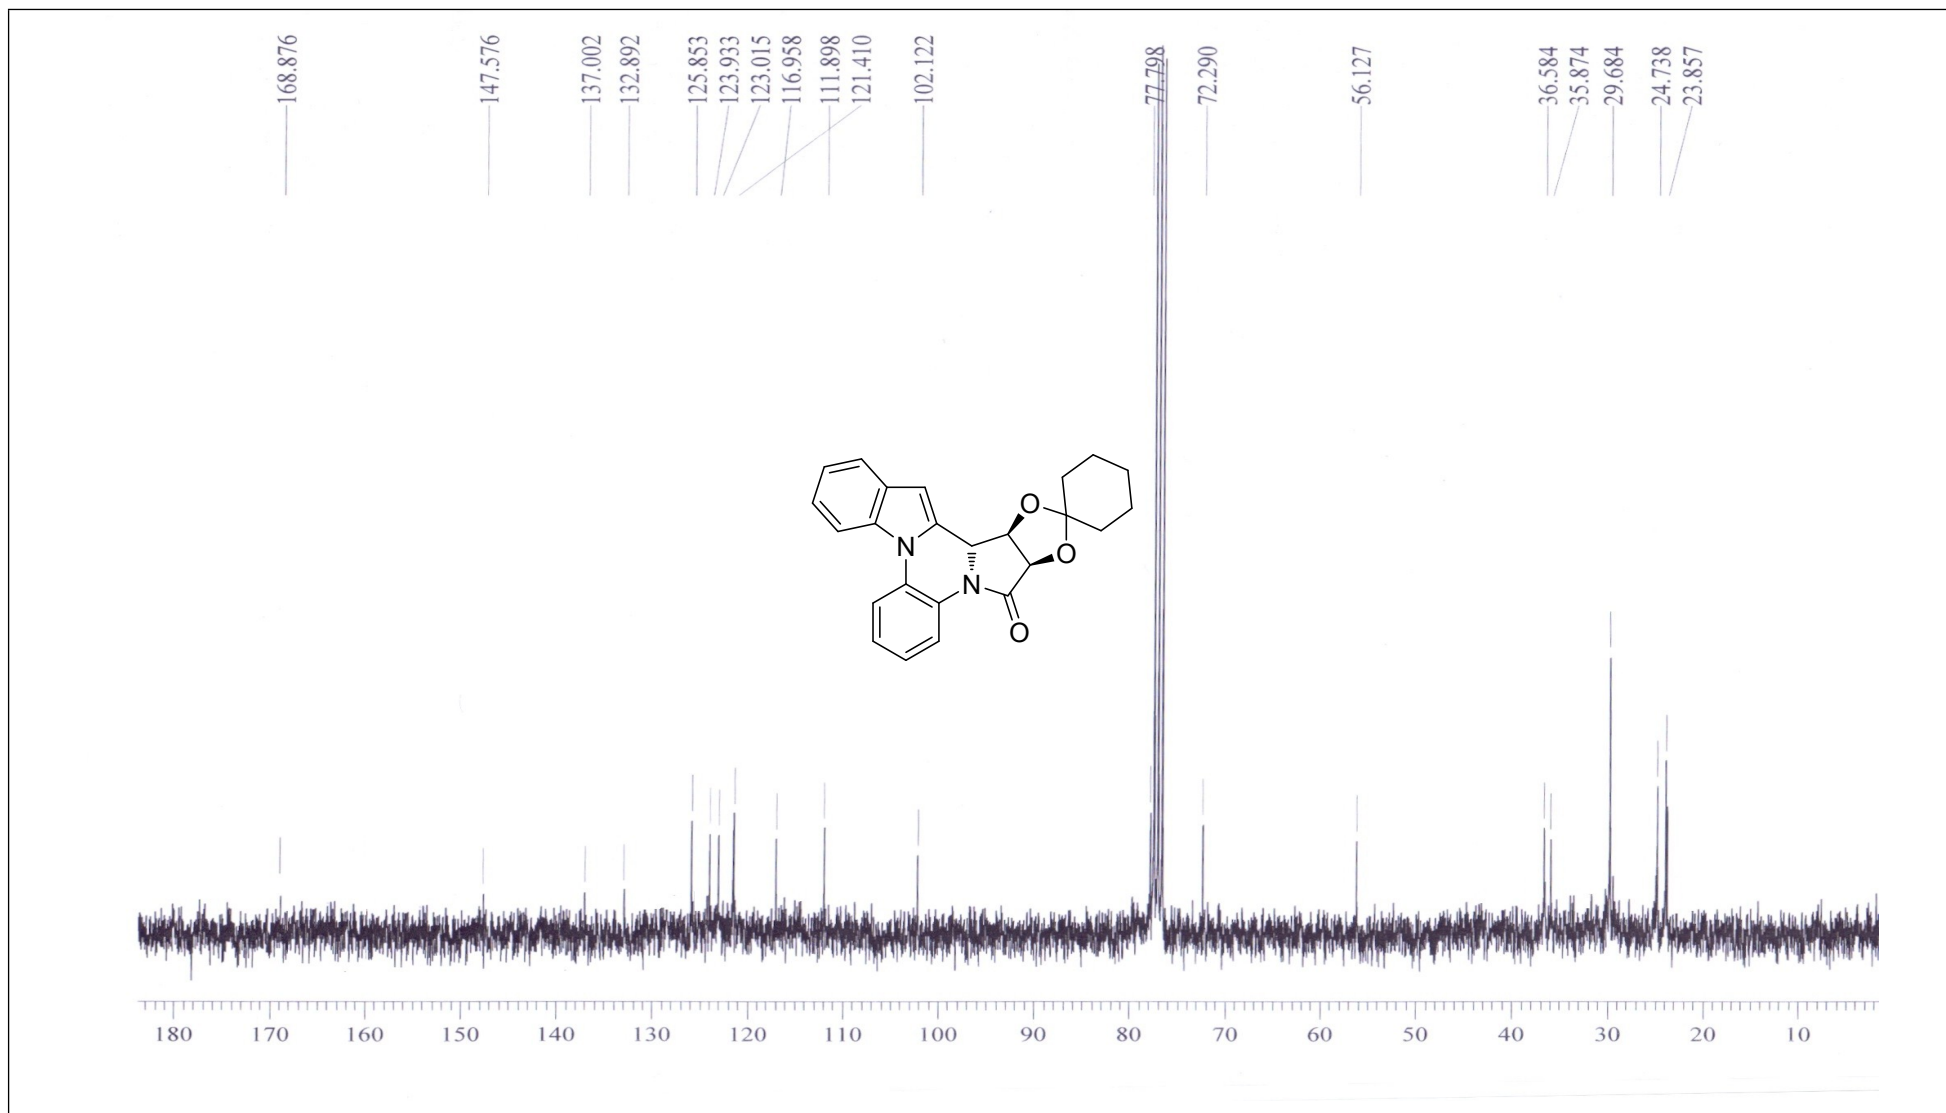

$^1\text{H}$  NMR of Product **3b** (Table 2, entry **b**)

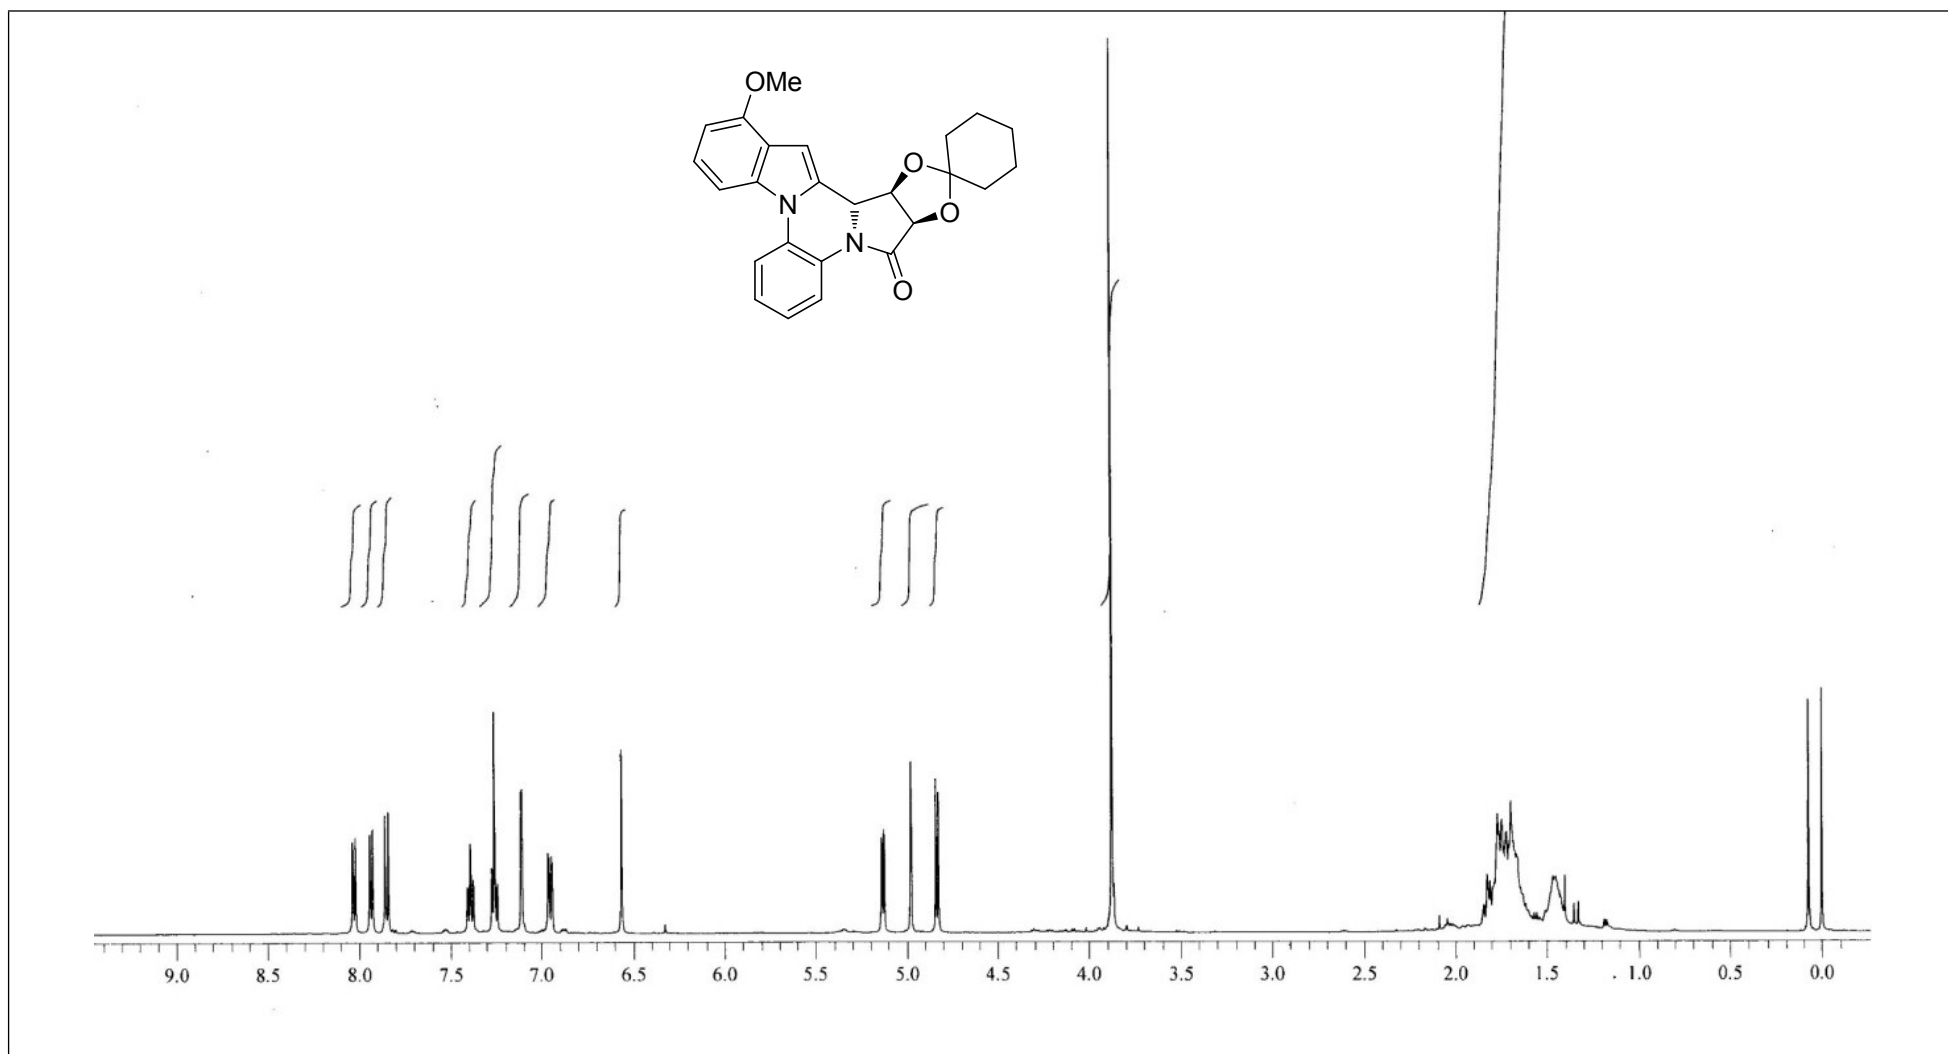

<sup>13</sup>C NMR of Product **3b** (Table 2, entry **b**)

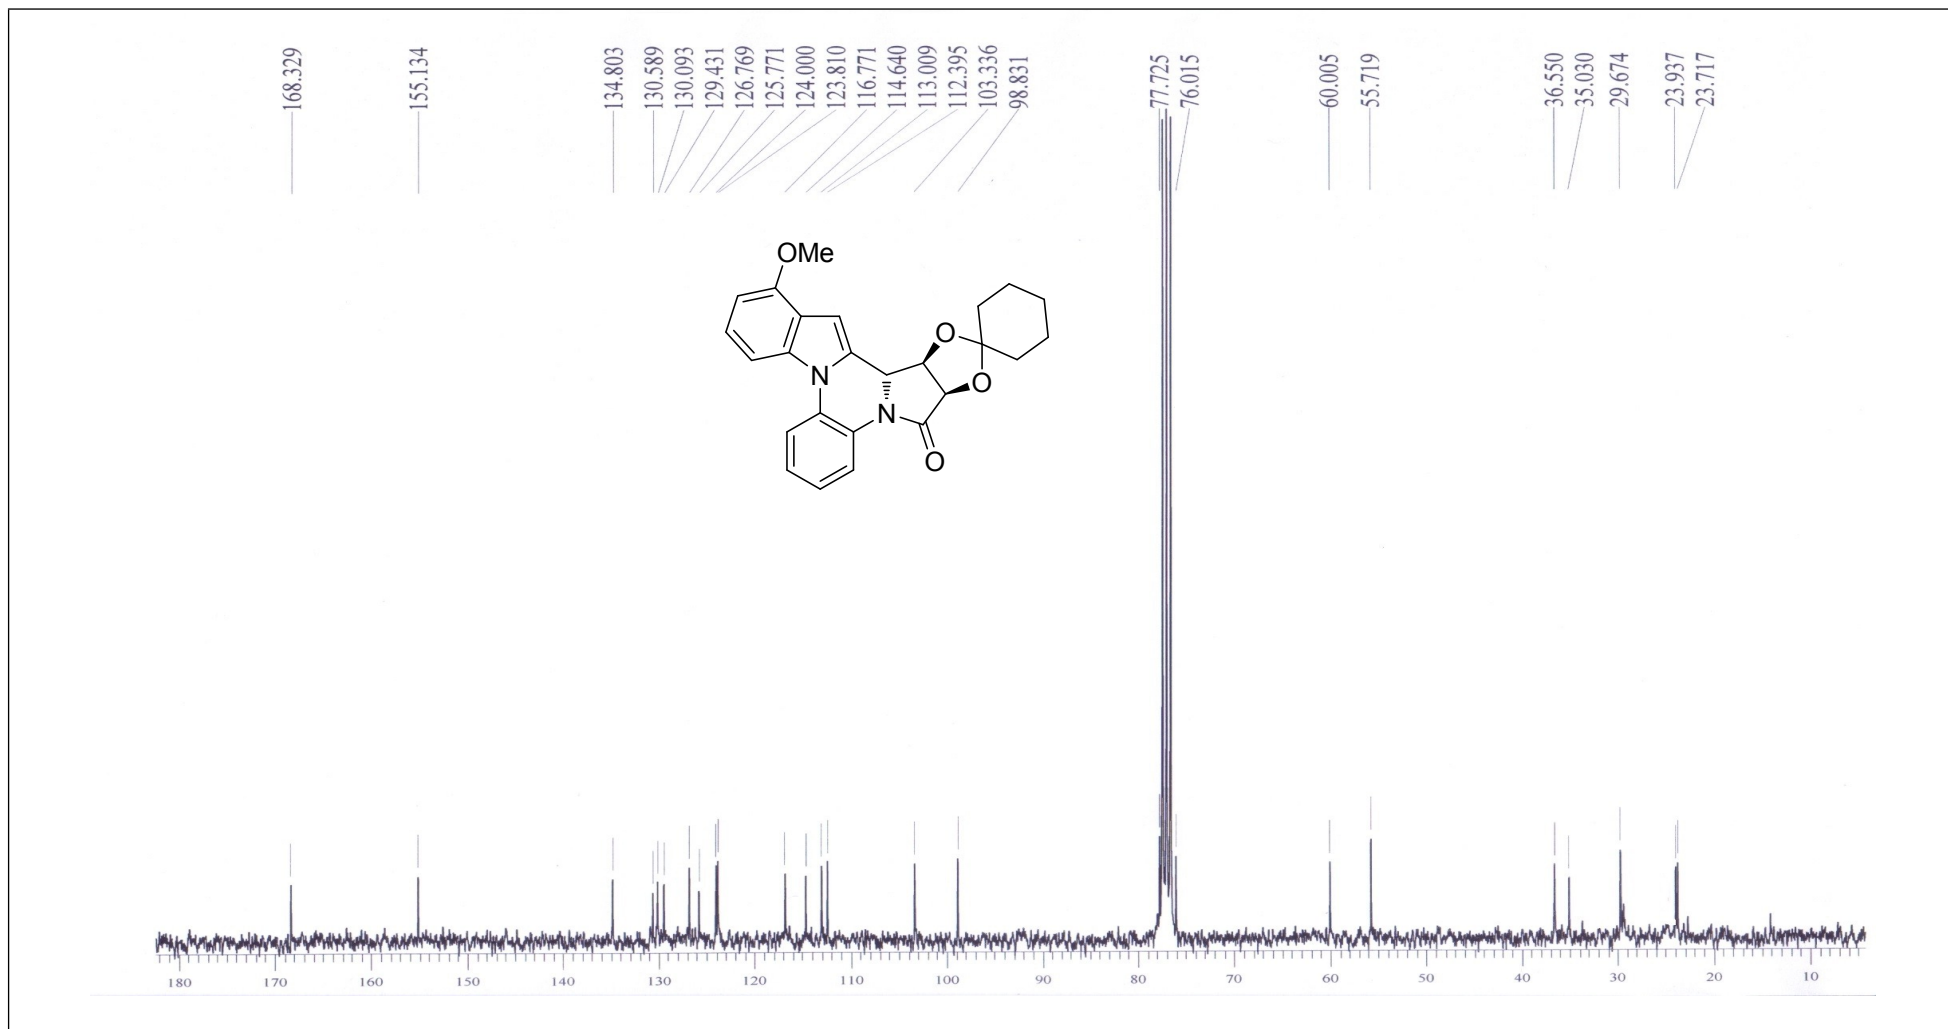

<sup>1</sup>H NMR of Product **3c** (Table 2, entry c)

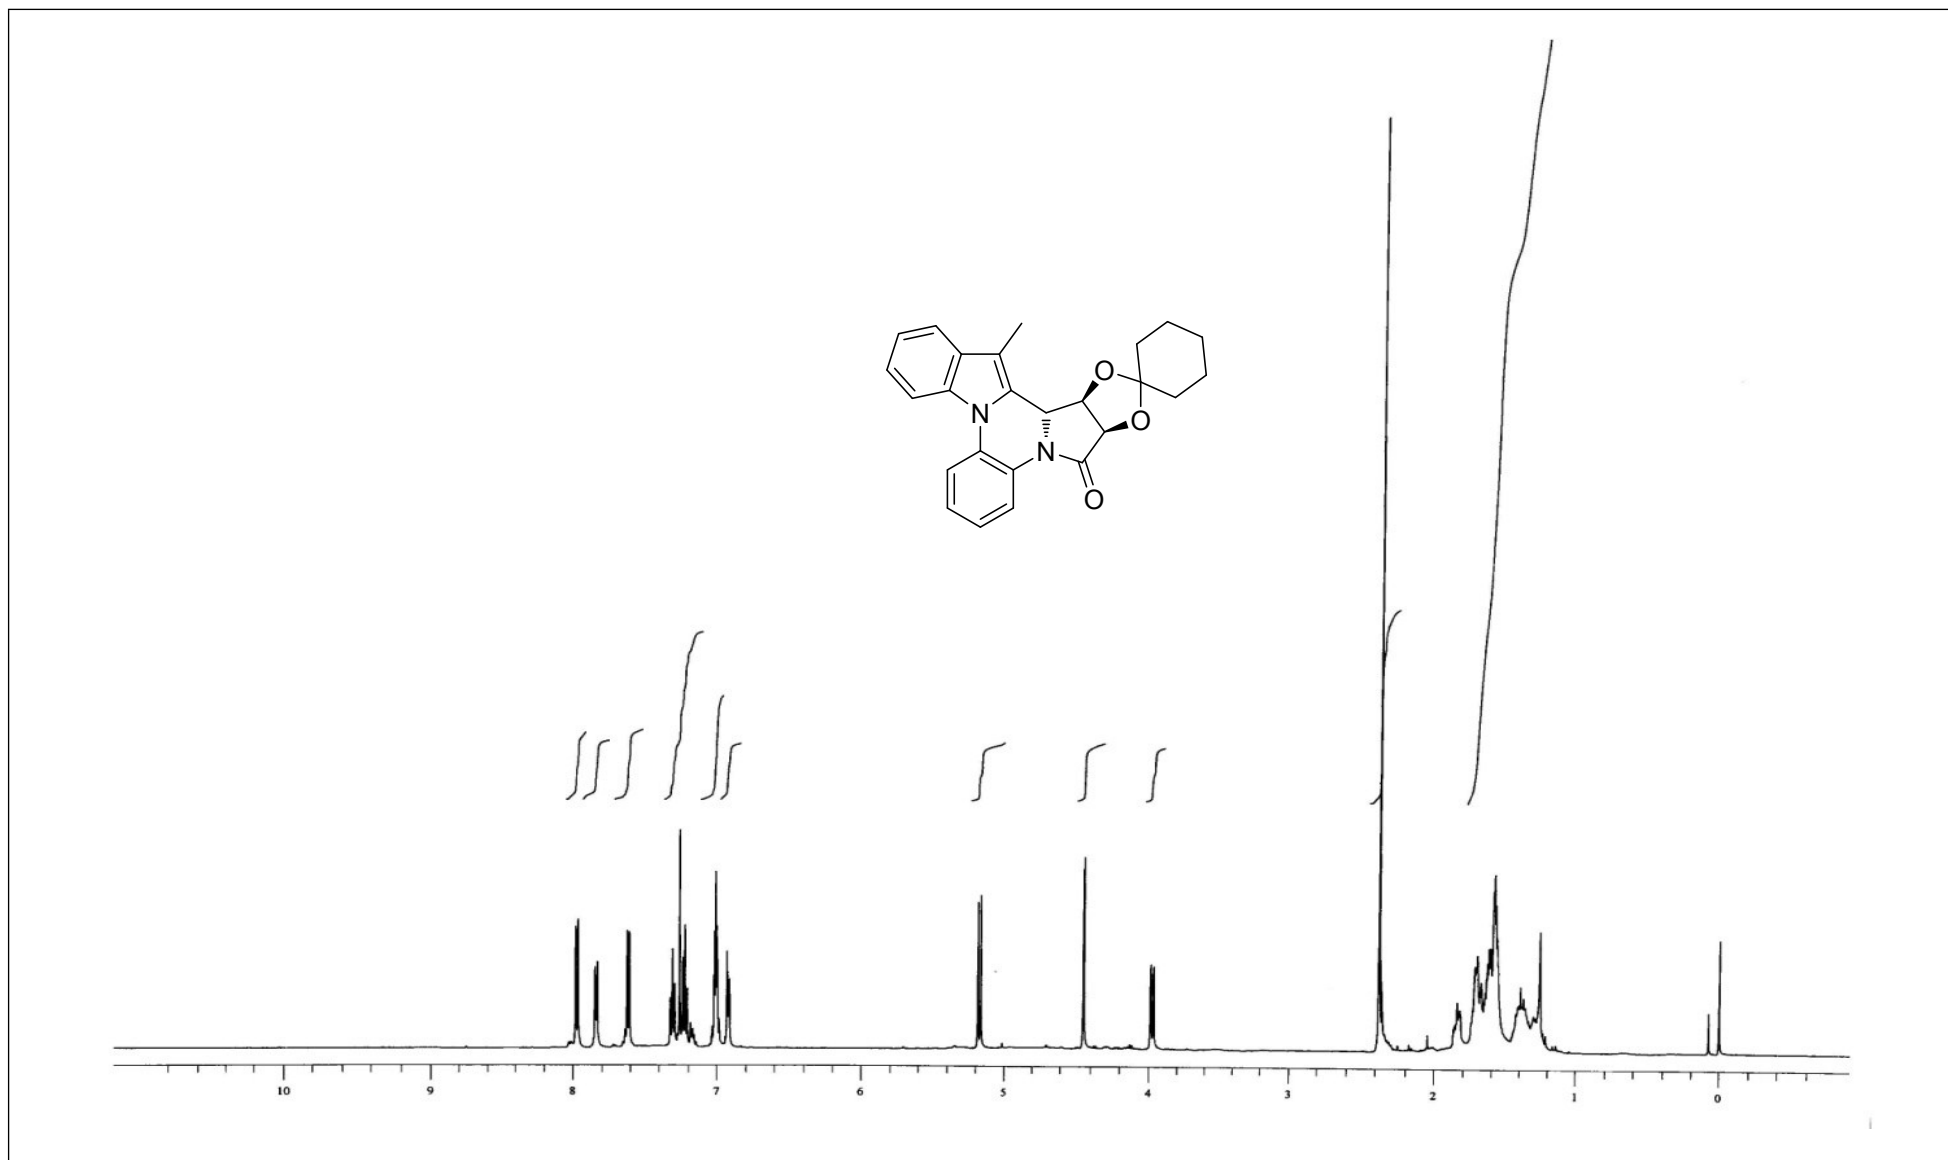

<sup>13</sup>C NMR of Product 3c (Table 2, entry c)

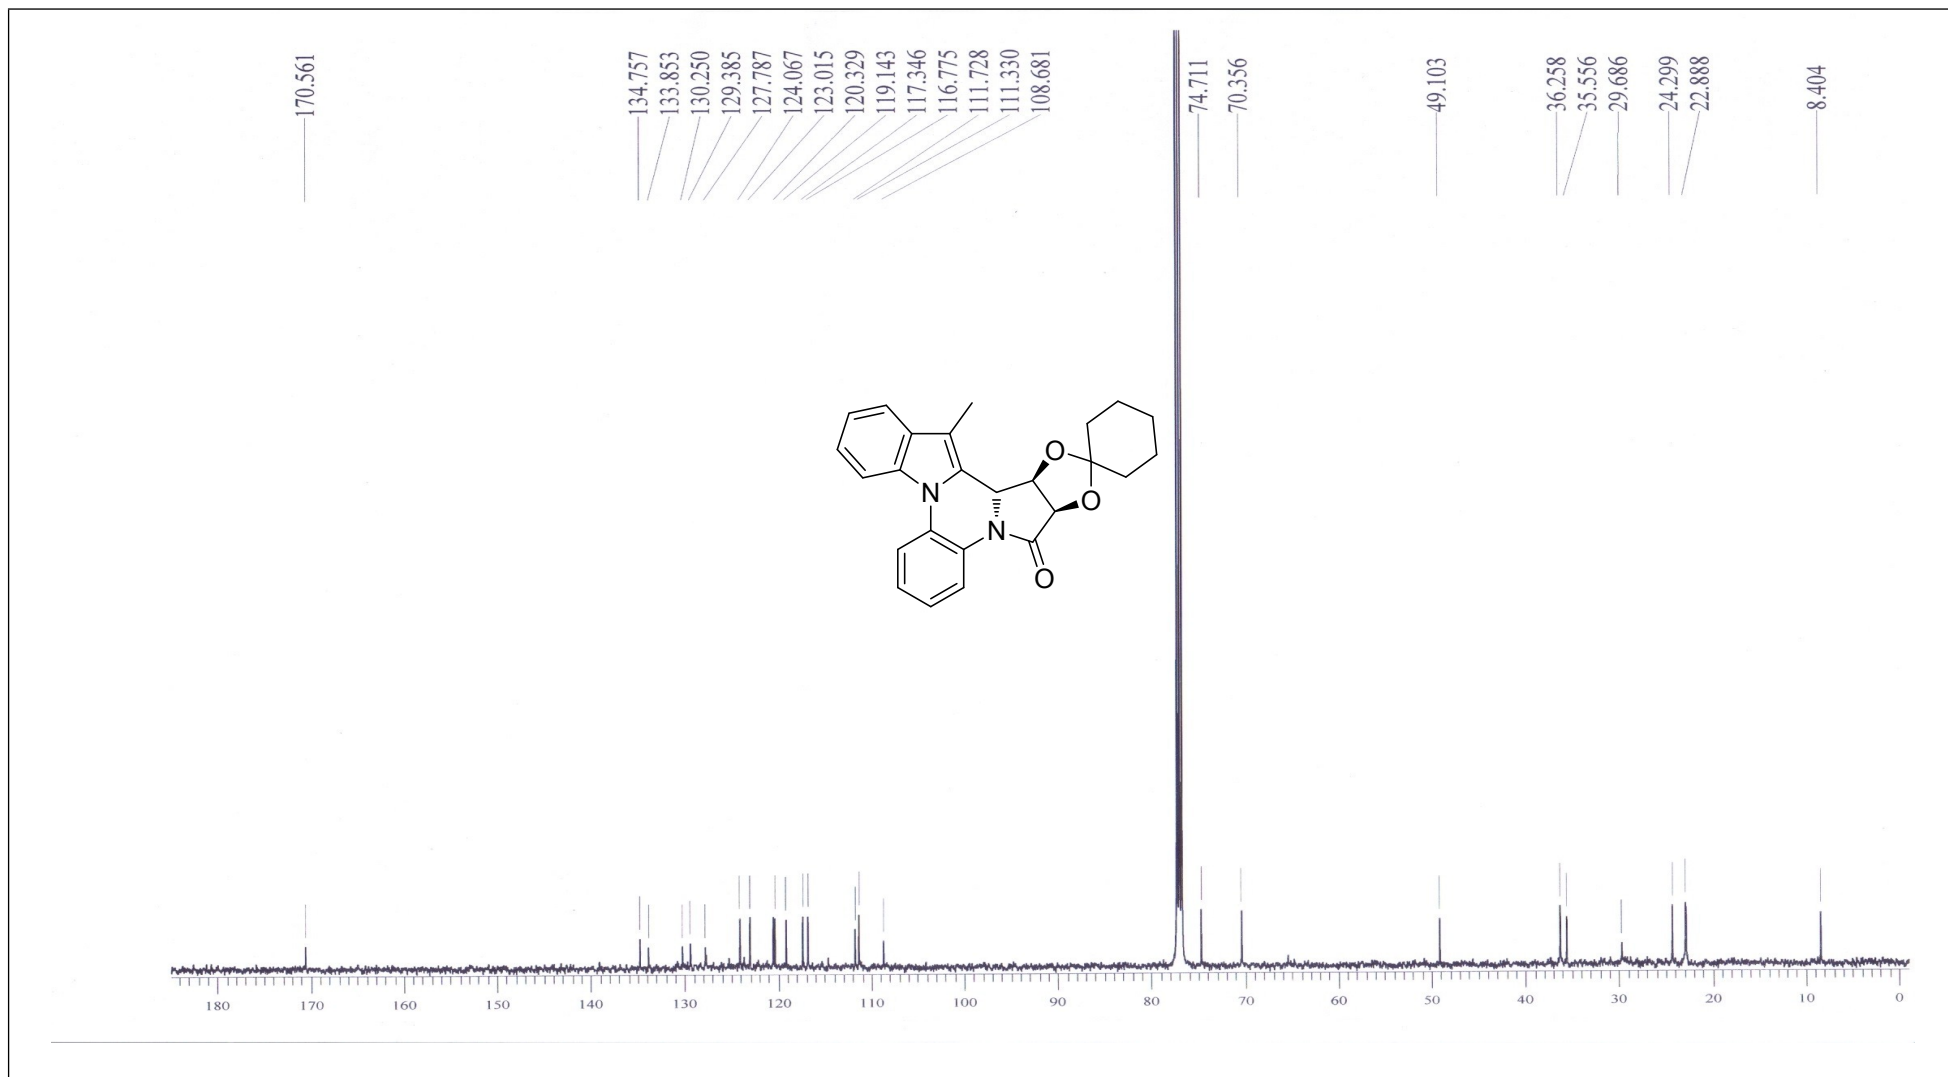

<sup>1</sup>H NMR of Product **3d** (Table 2, entry **d**)

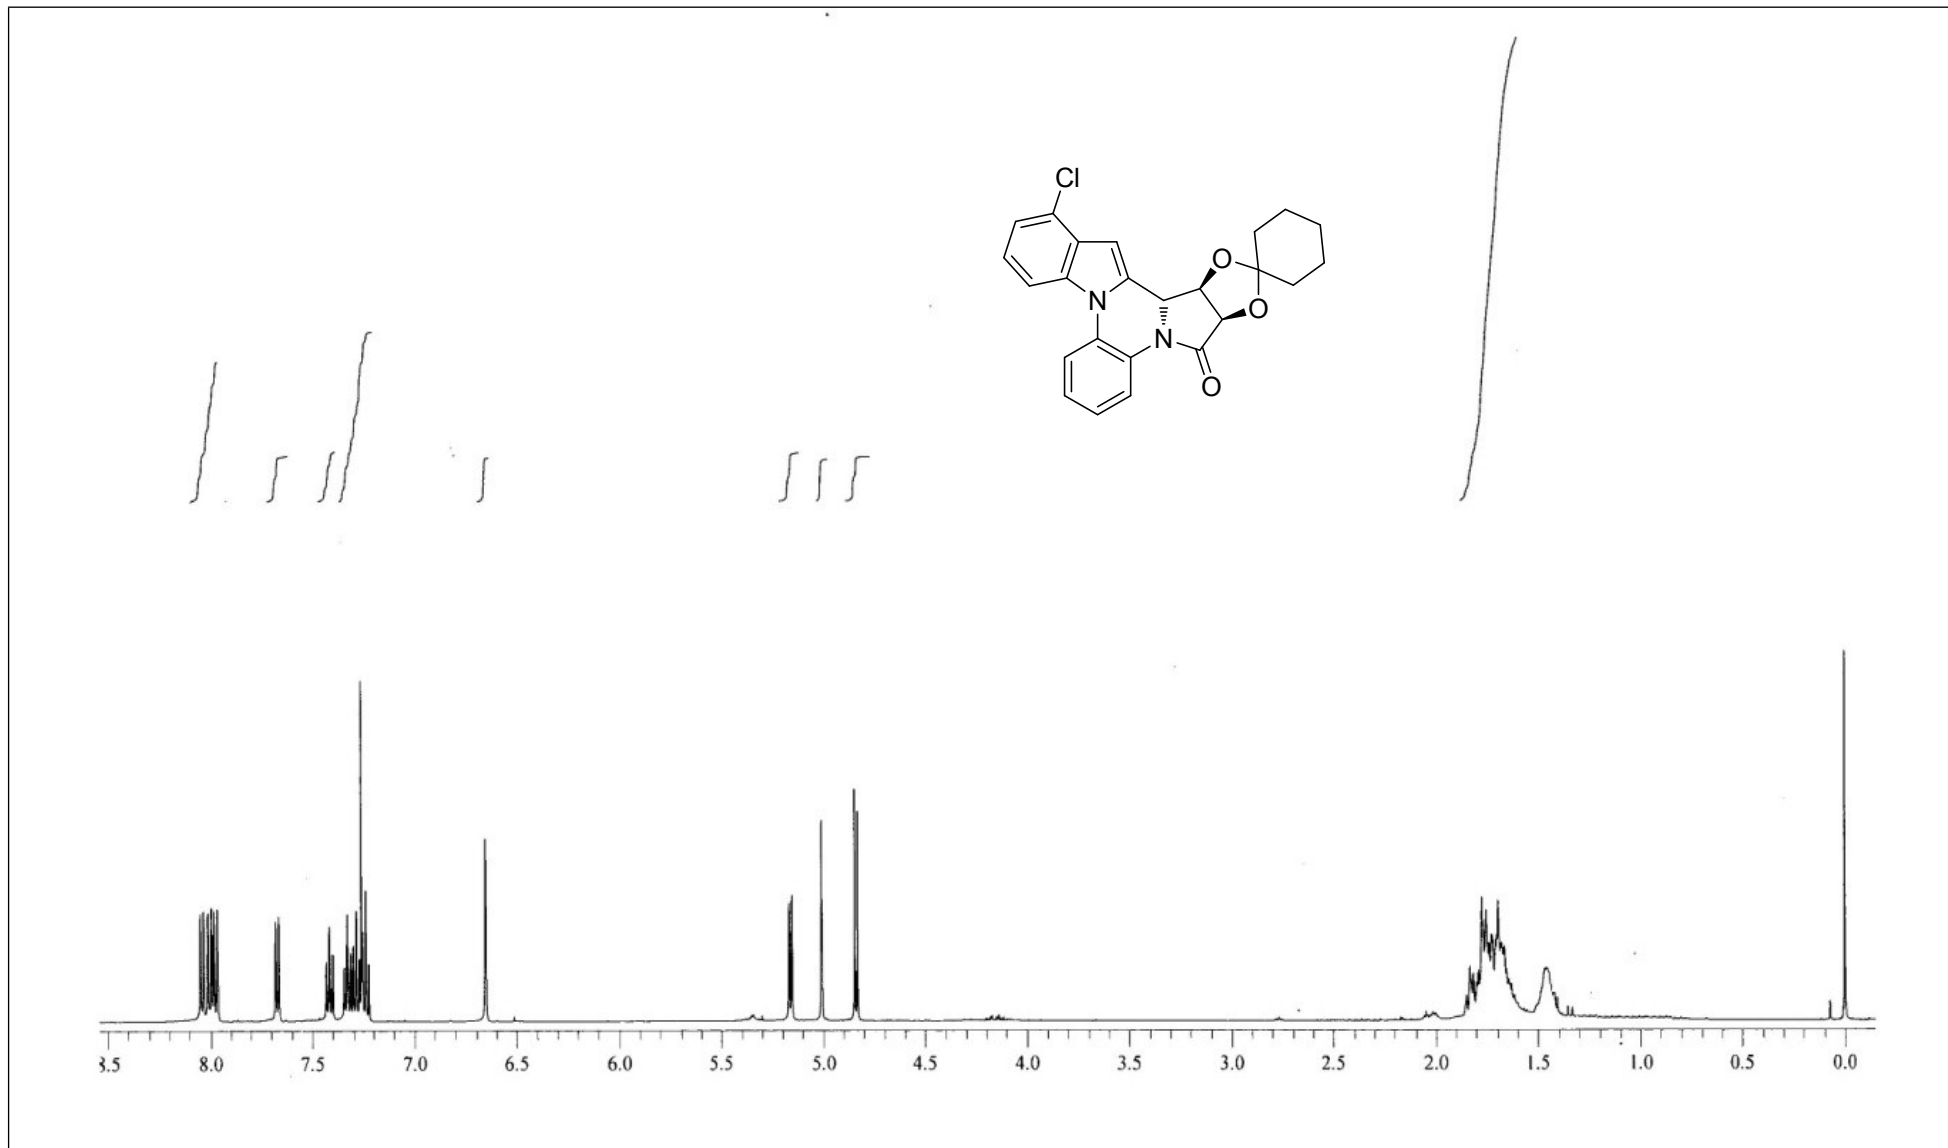



<sup>13</sup>C NMR of Product **3d** (Table 2, entry **d**)

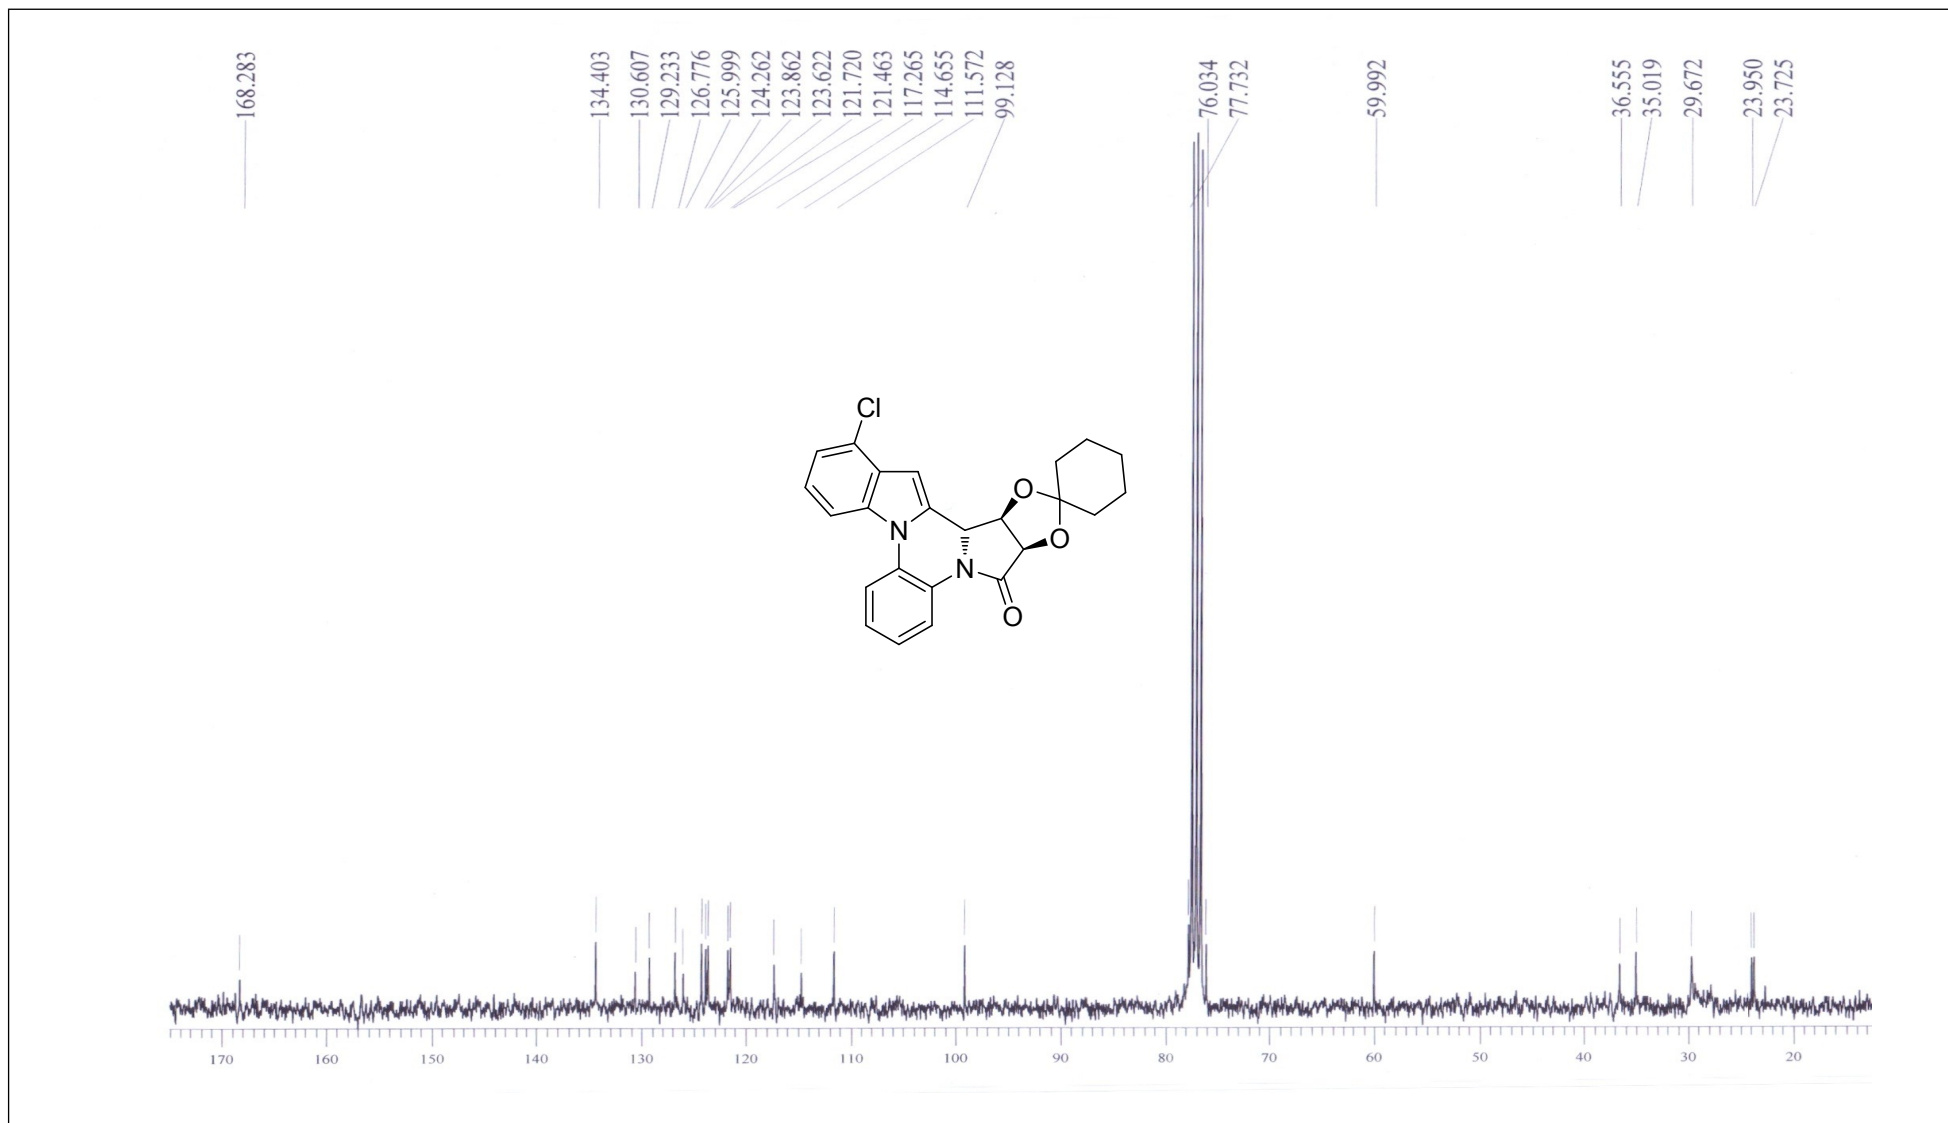

$^1\text{H}$  NMR of Product **3e** (Table 2, entry e)

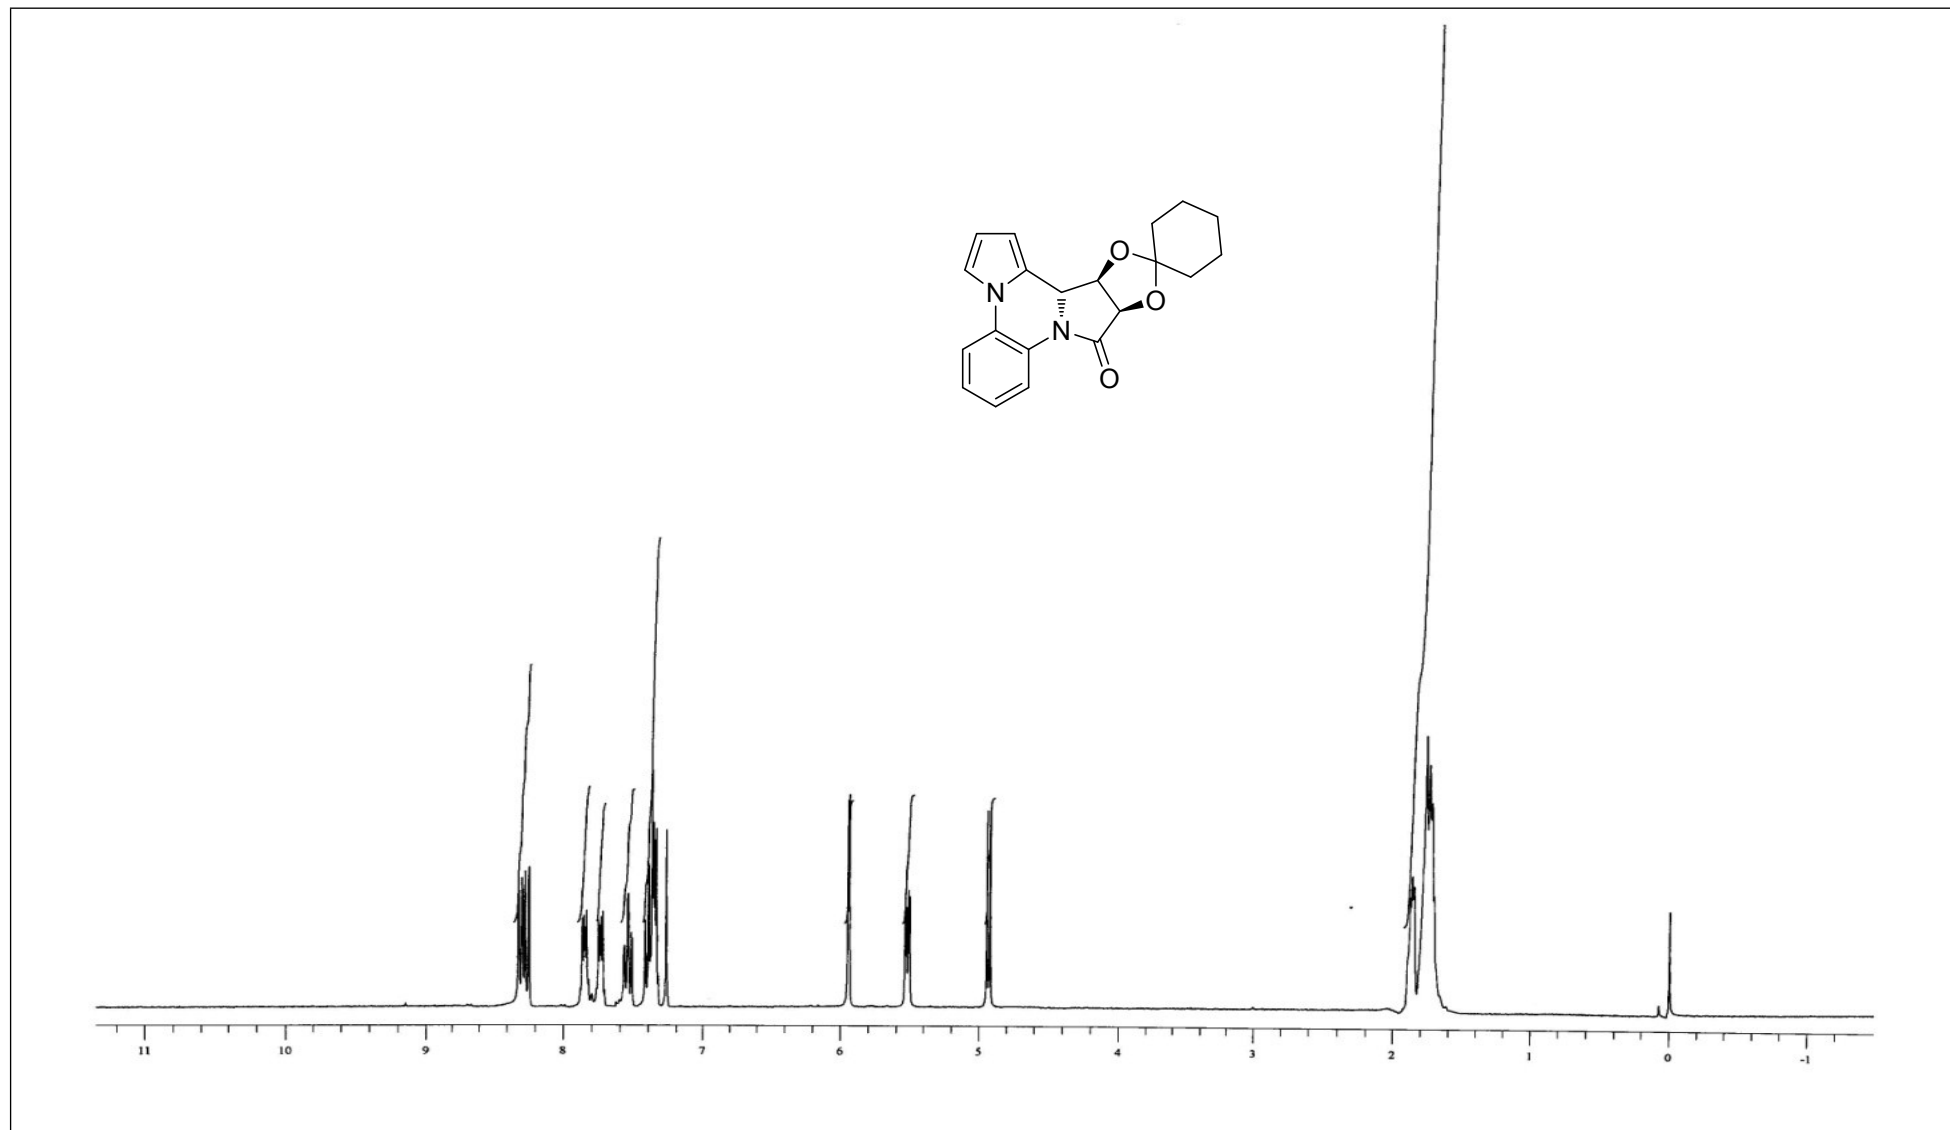

<sup>13</sup>C NMR of Product 3e (Table 2, entry e)

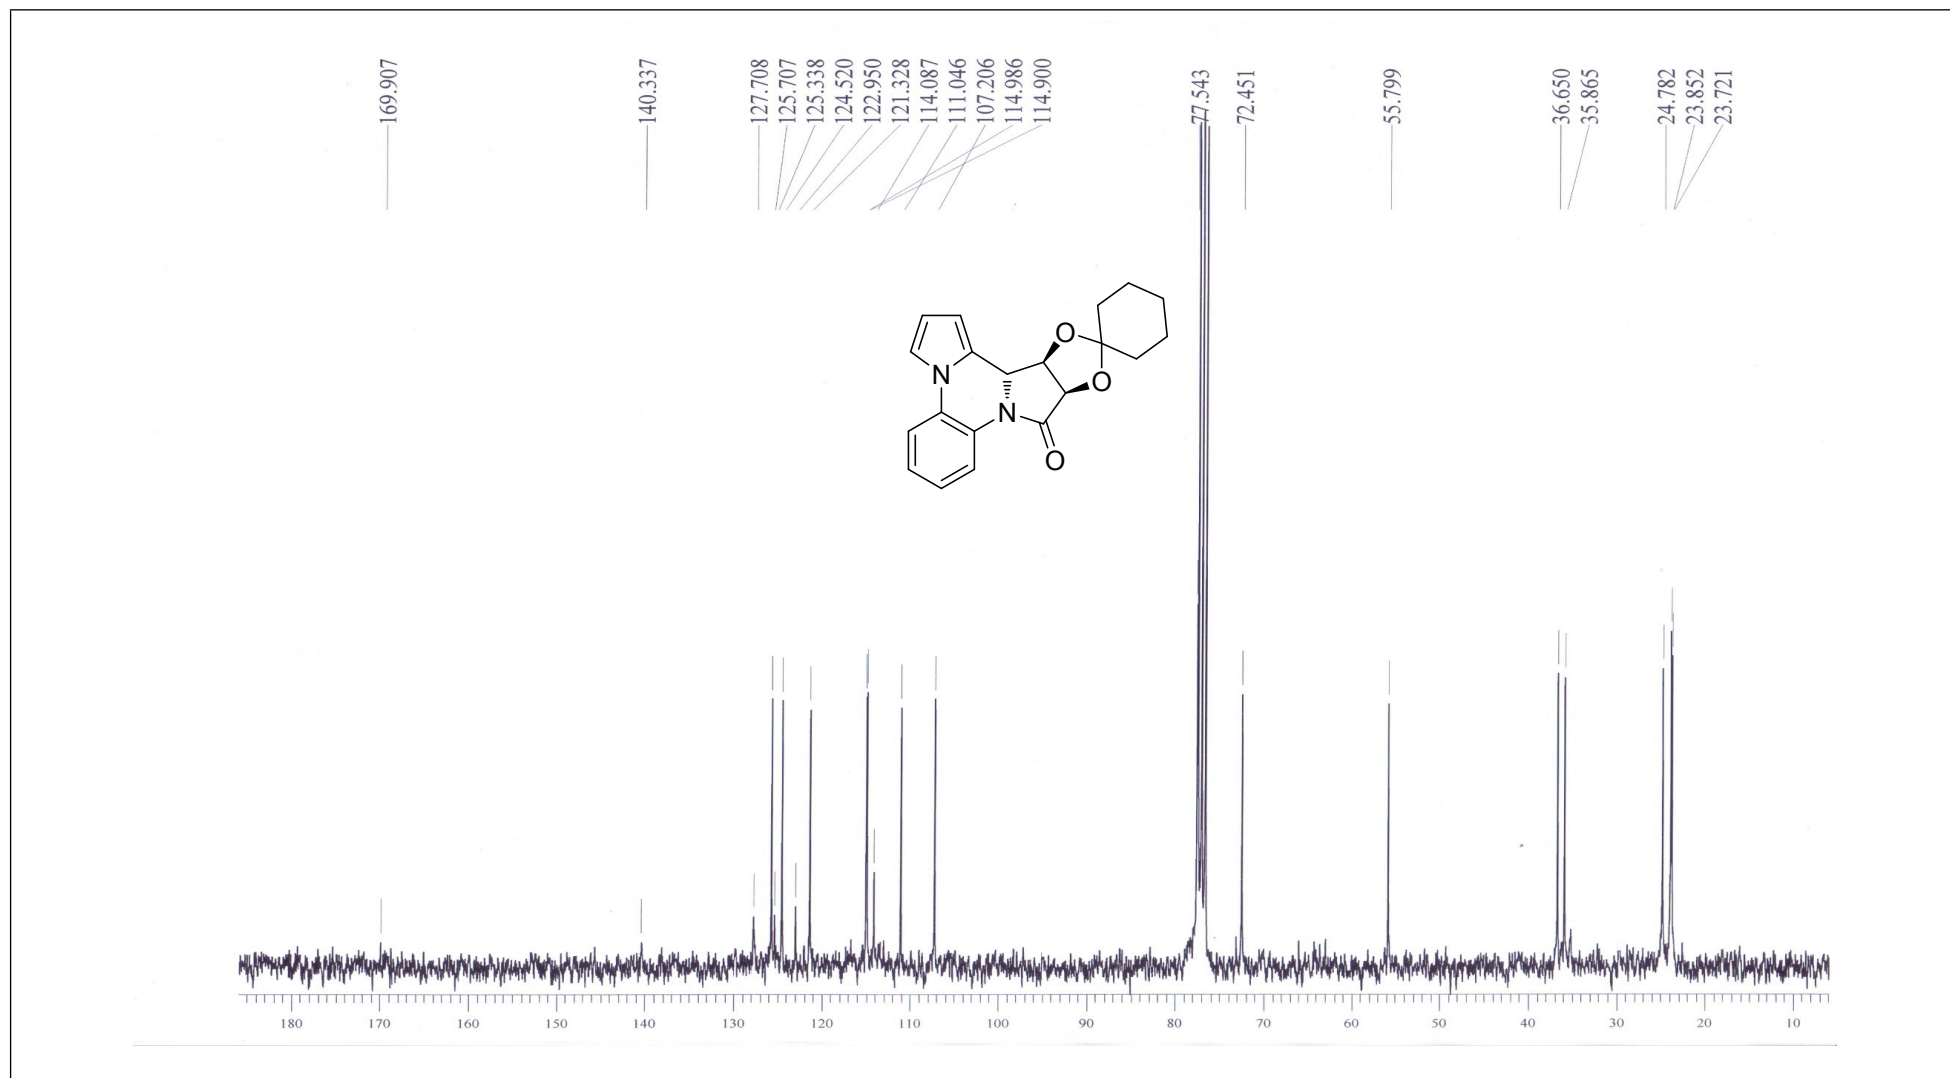

<sup>1</sup>H NMR of Product **3f** (Table 2, entry **f**)

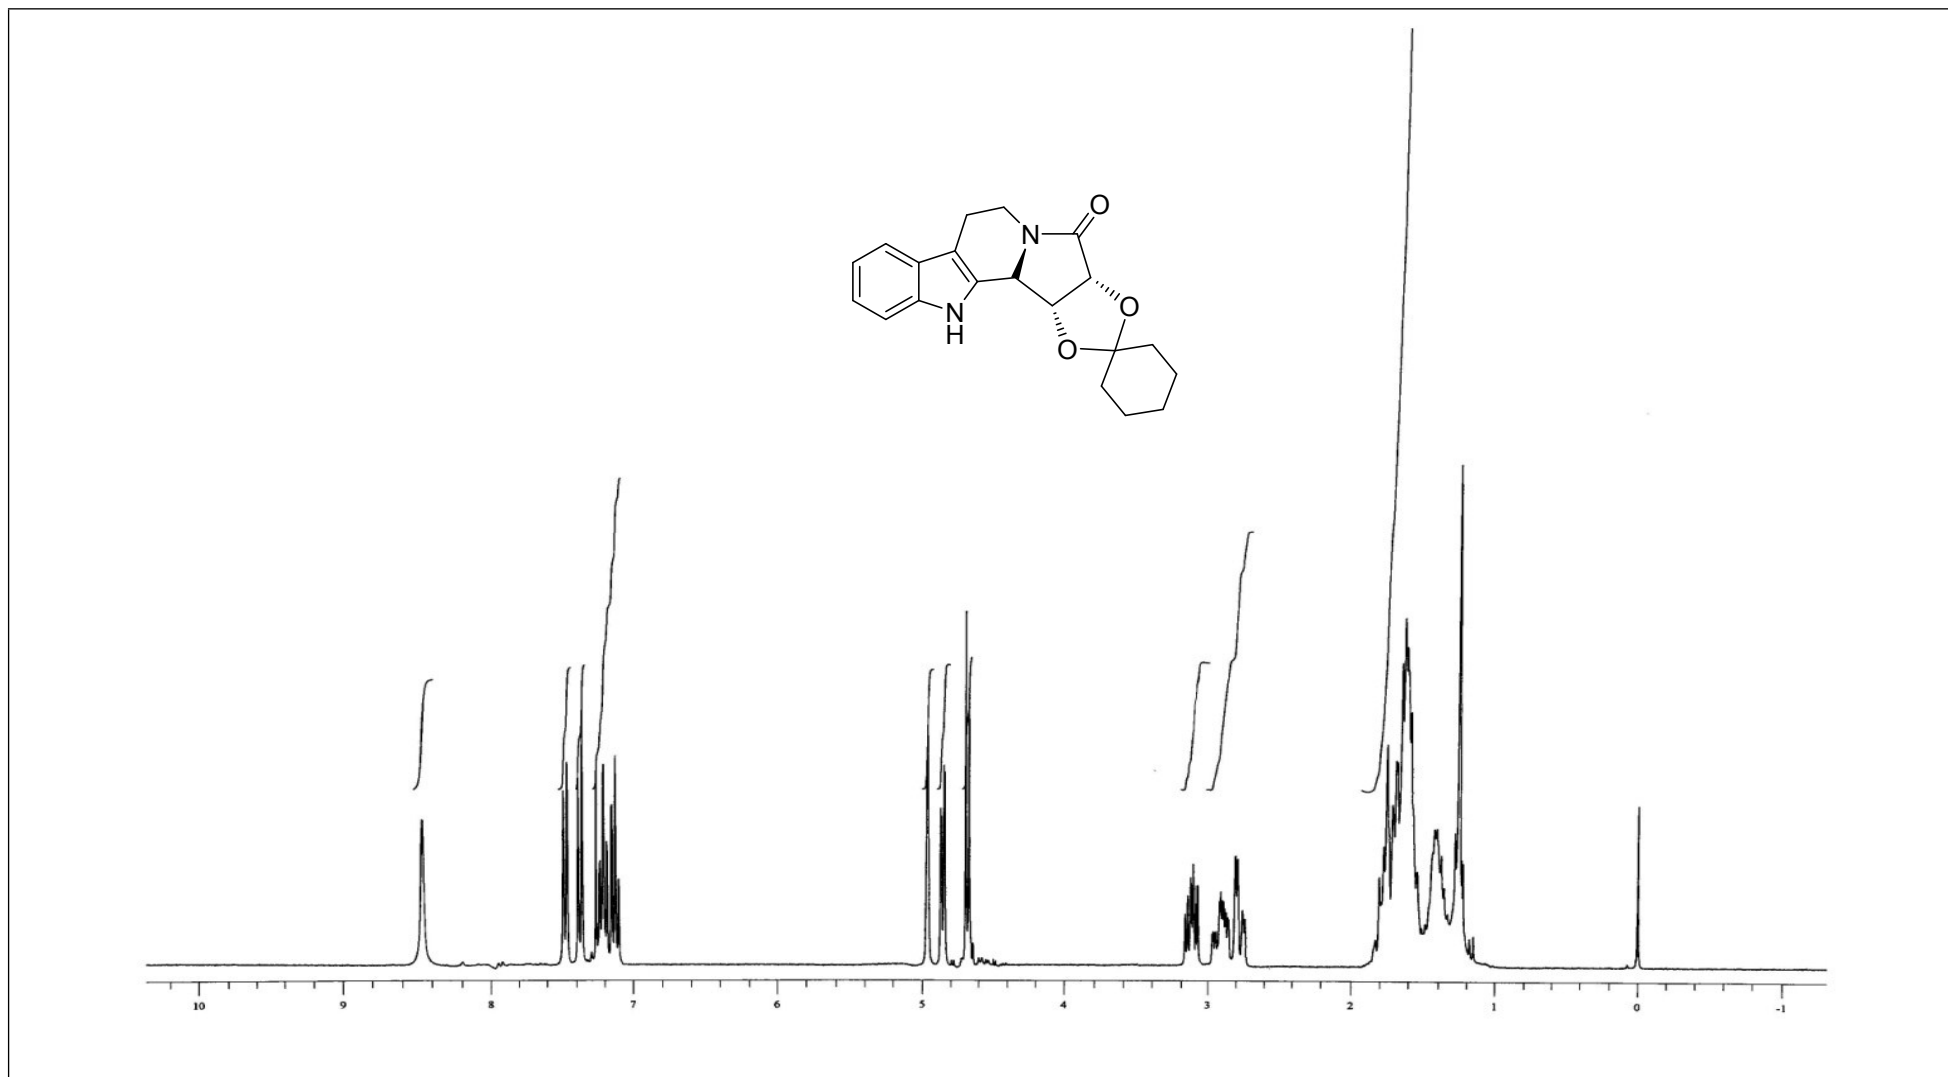

<sup>13</sup>C NMR of Product **3f** (Table 2, entry **f**)

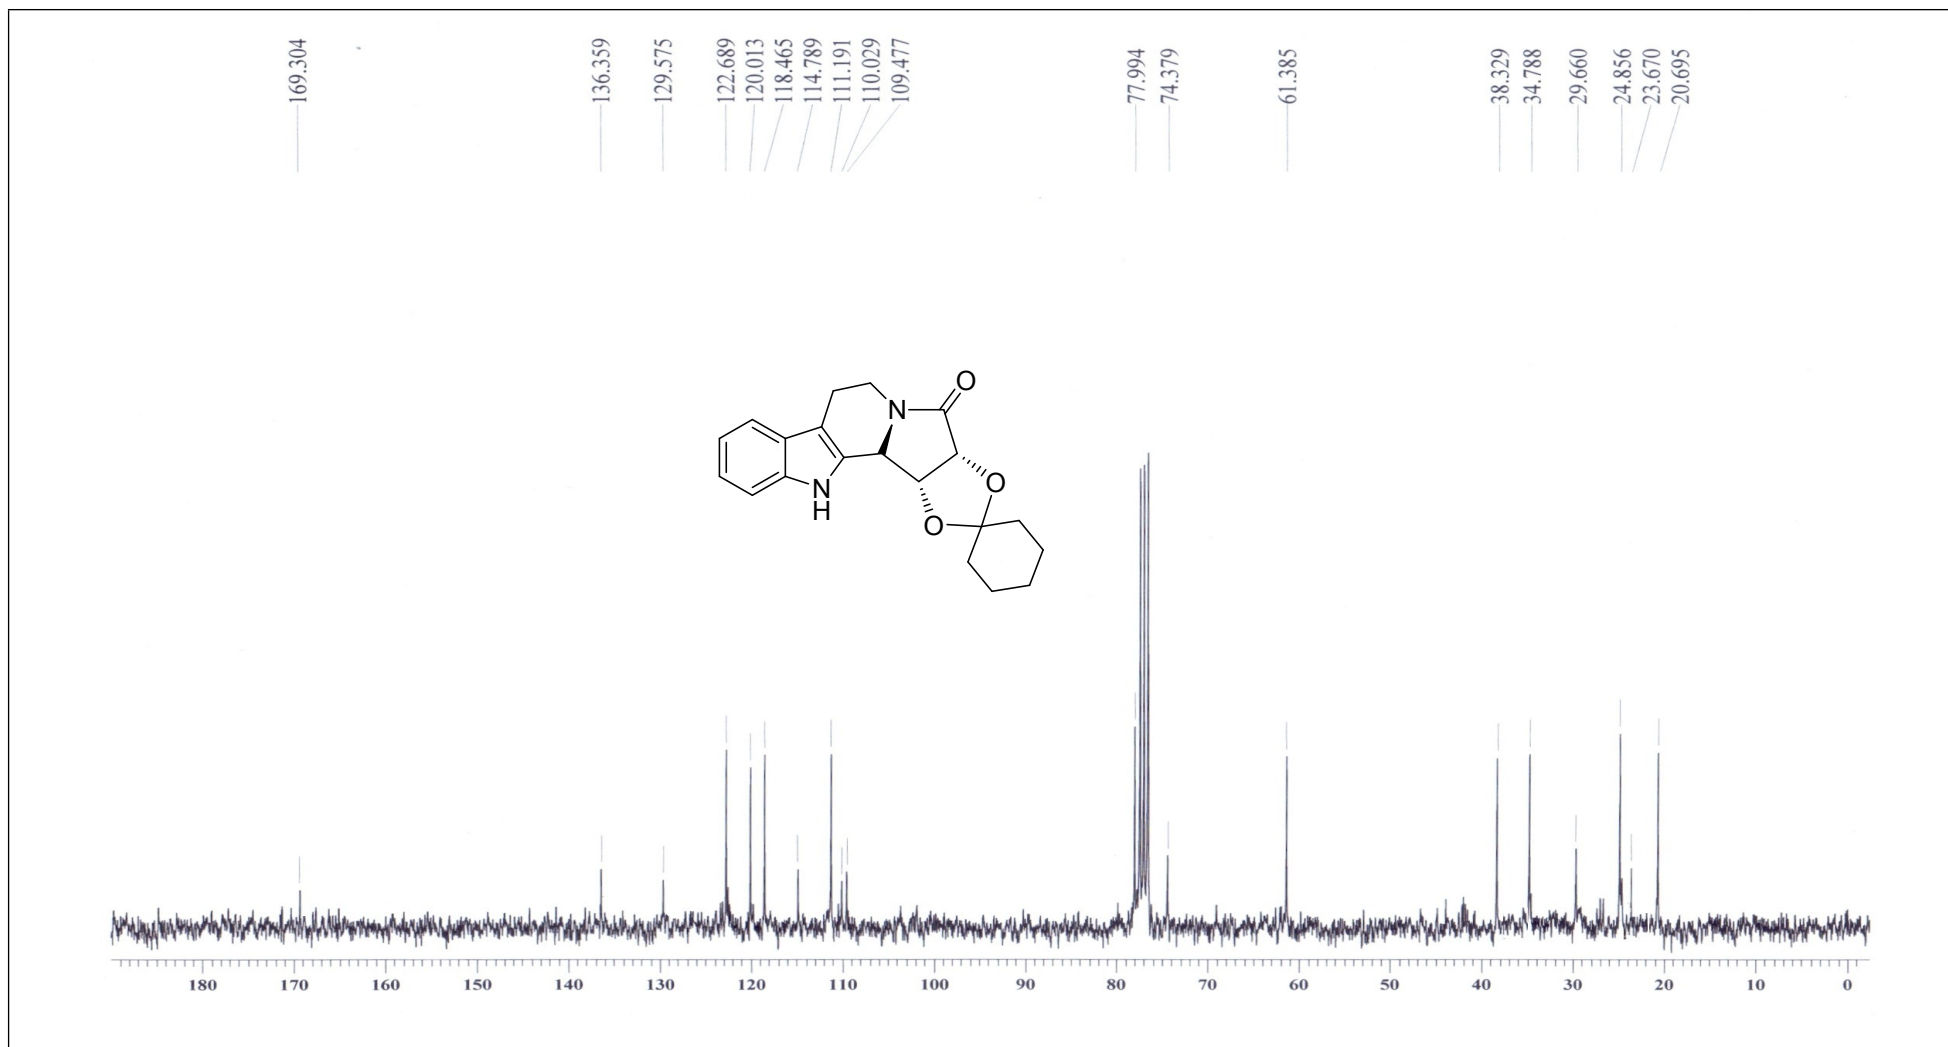

<sup>1</sup>H NMR of Product **3g** (Table 2, entry **g**)

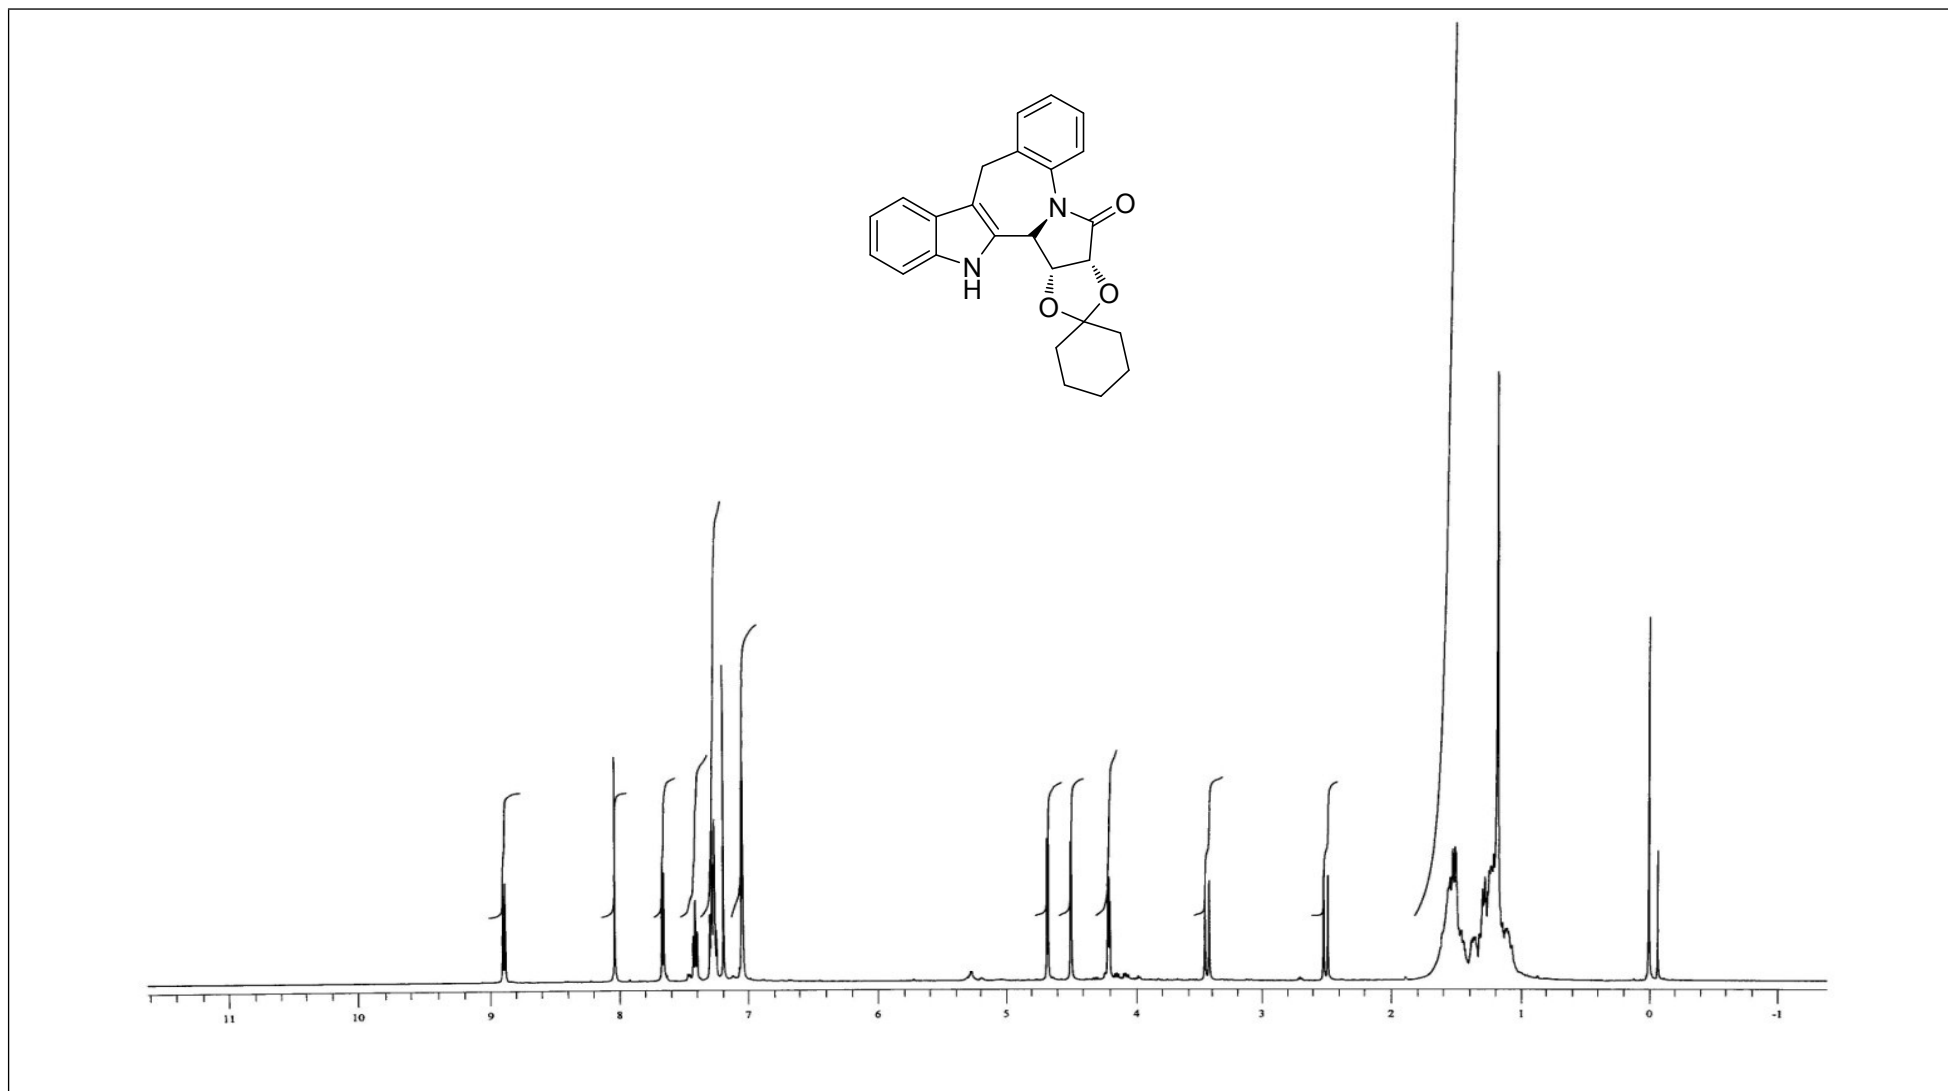

<sup>13</sup>C NMR of Product **3g** (Table 2, entry **g**)

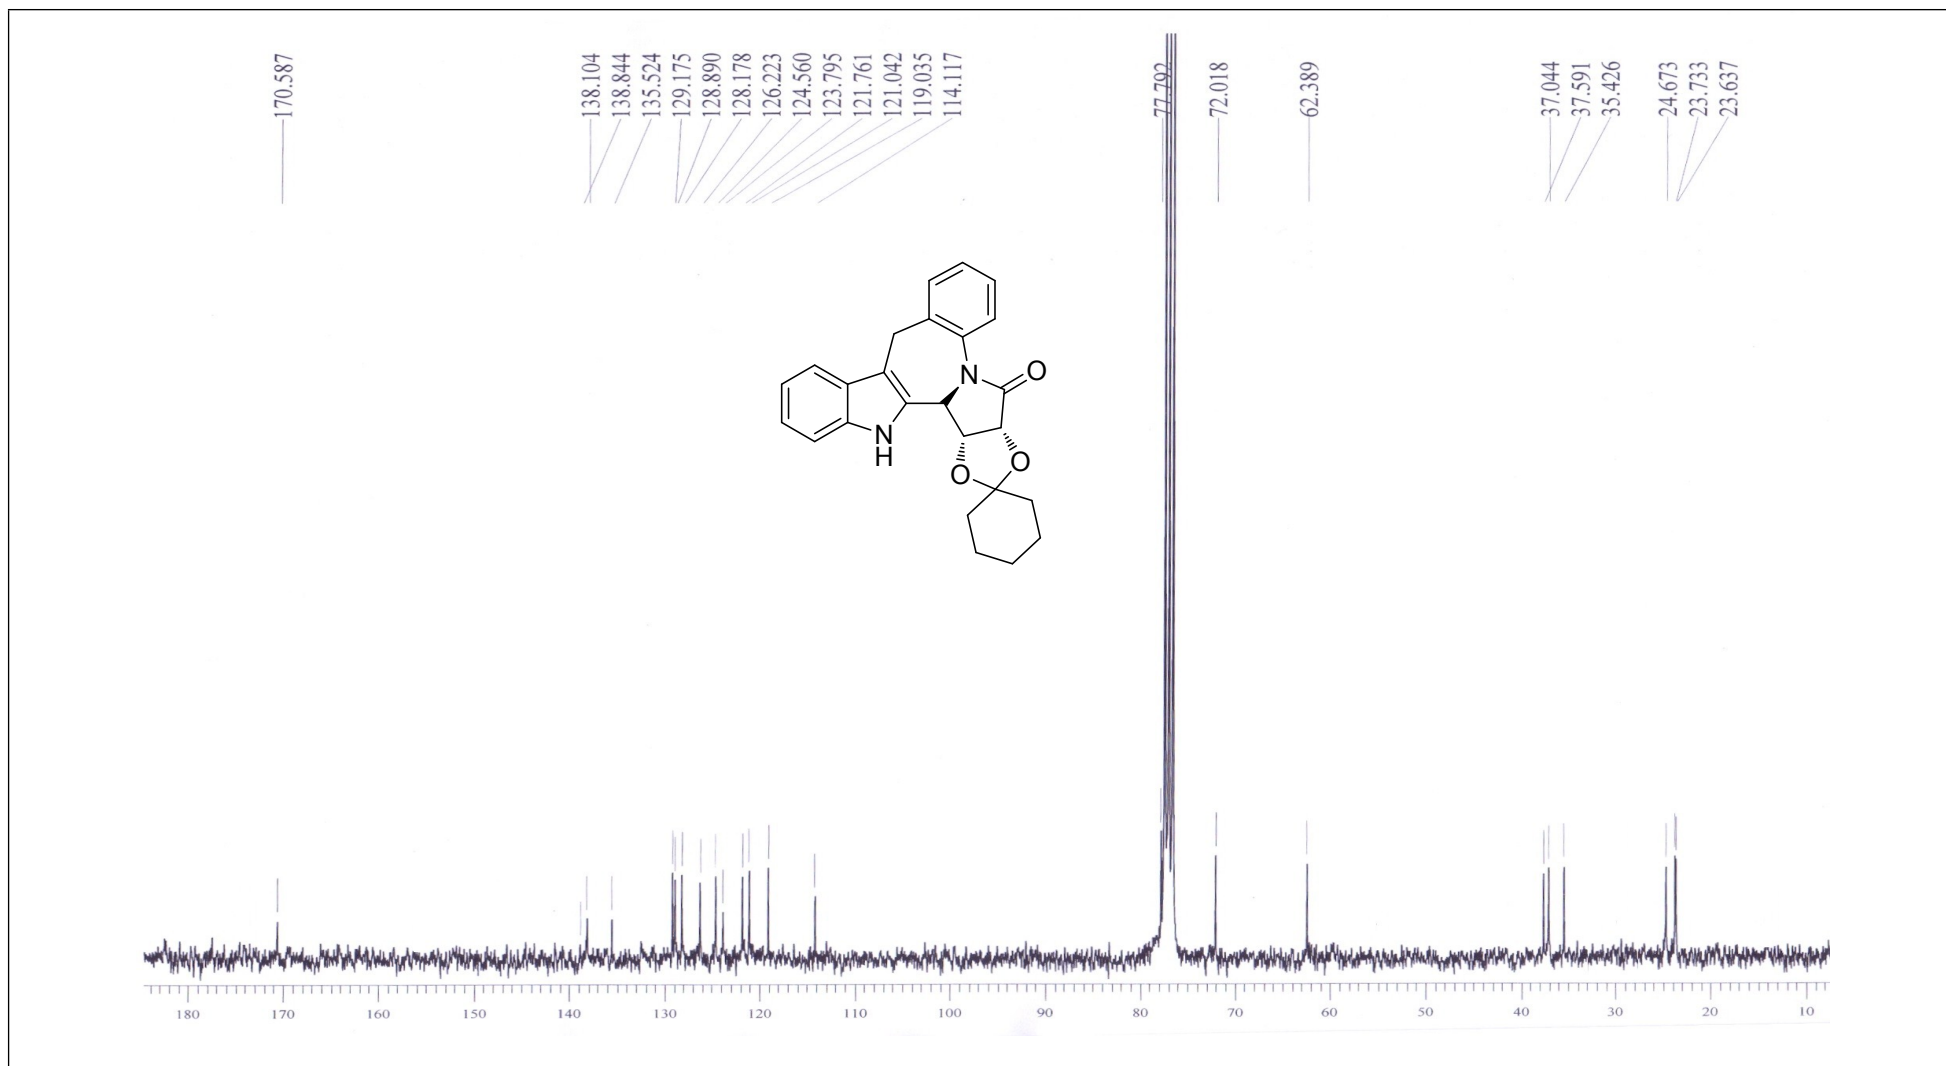

<sup>1</sup>H NMR of Product **3h** (Table 2, entry **h**)

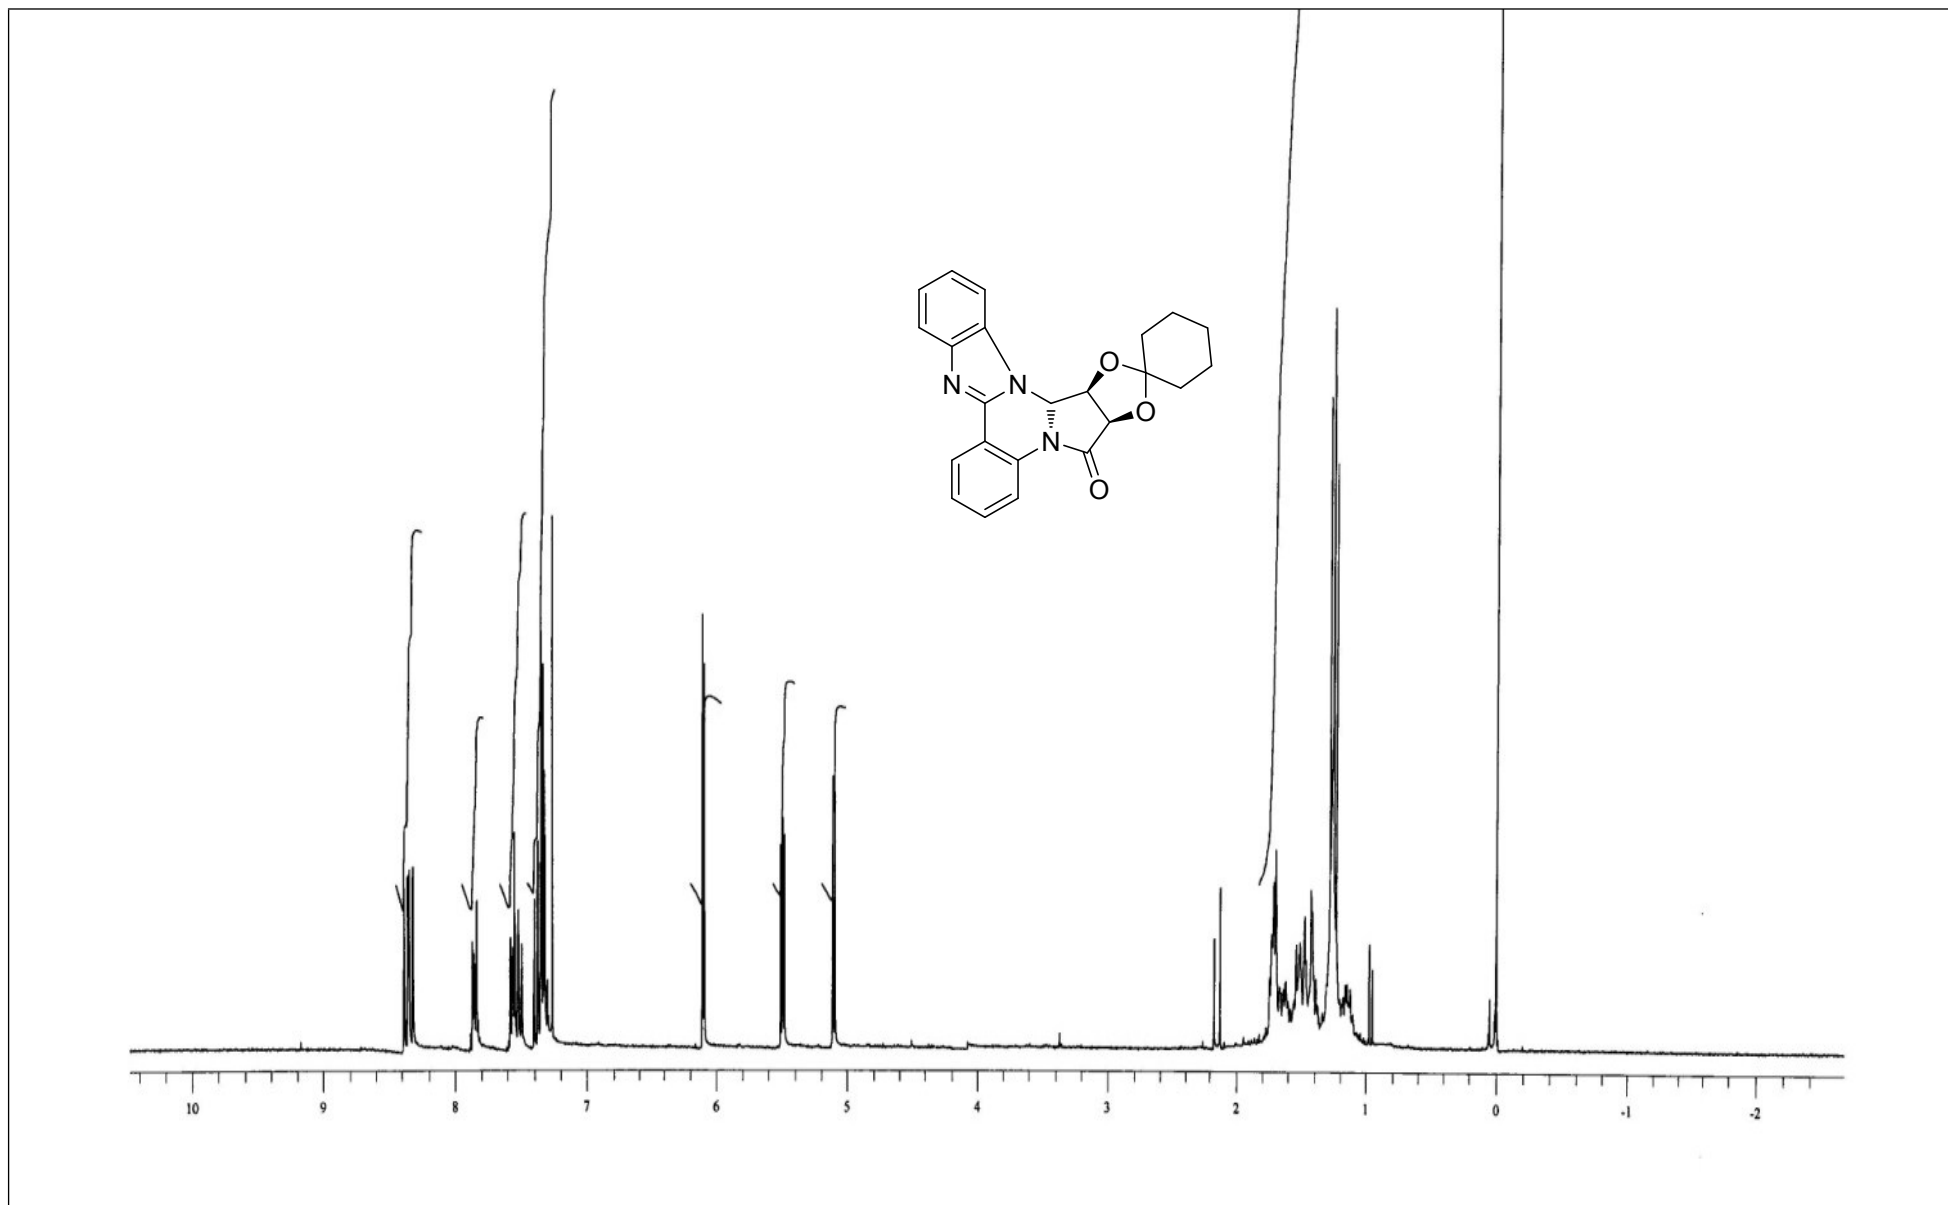



<sup>13</sup>C NMR of Product **3h** (Table 2, entry **h**)

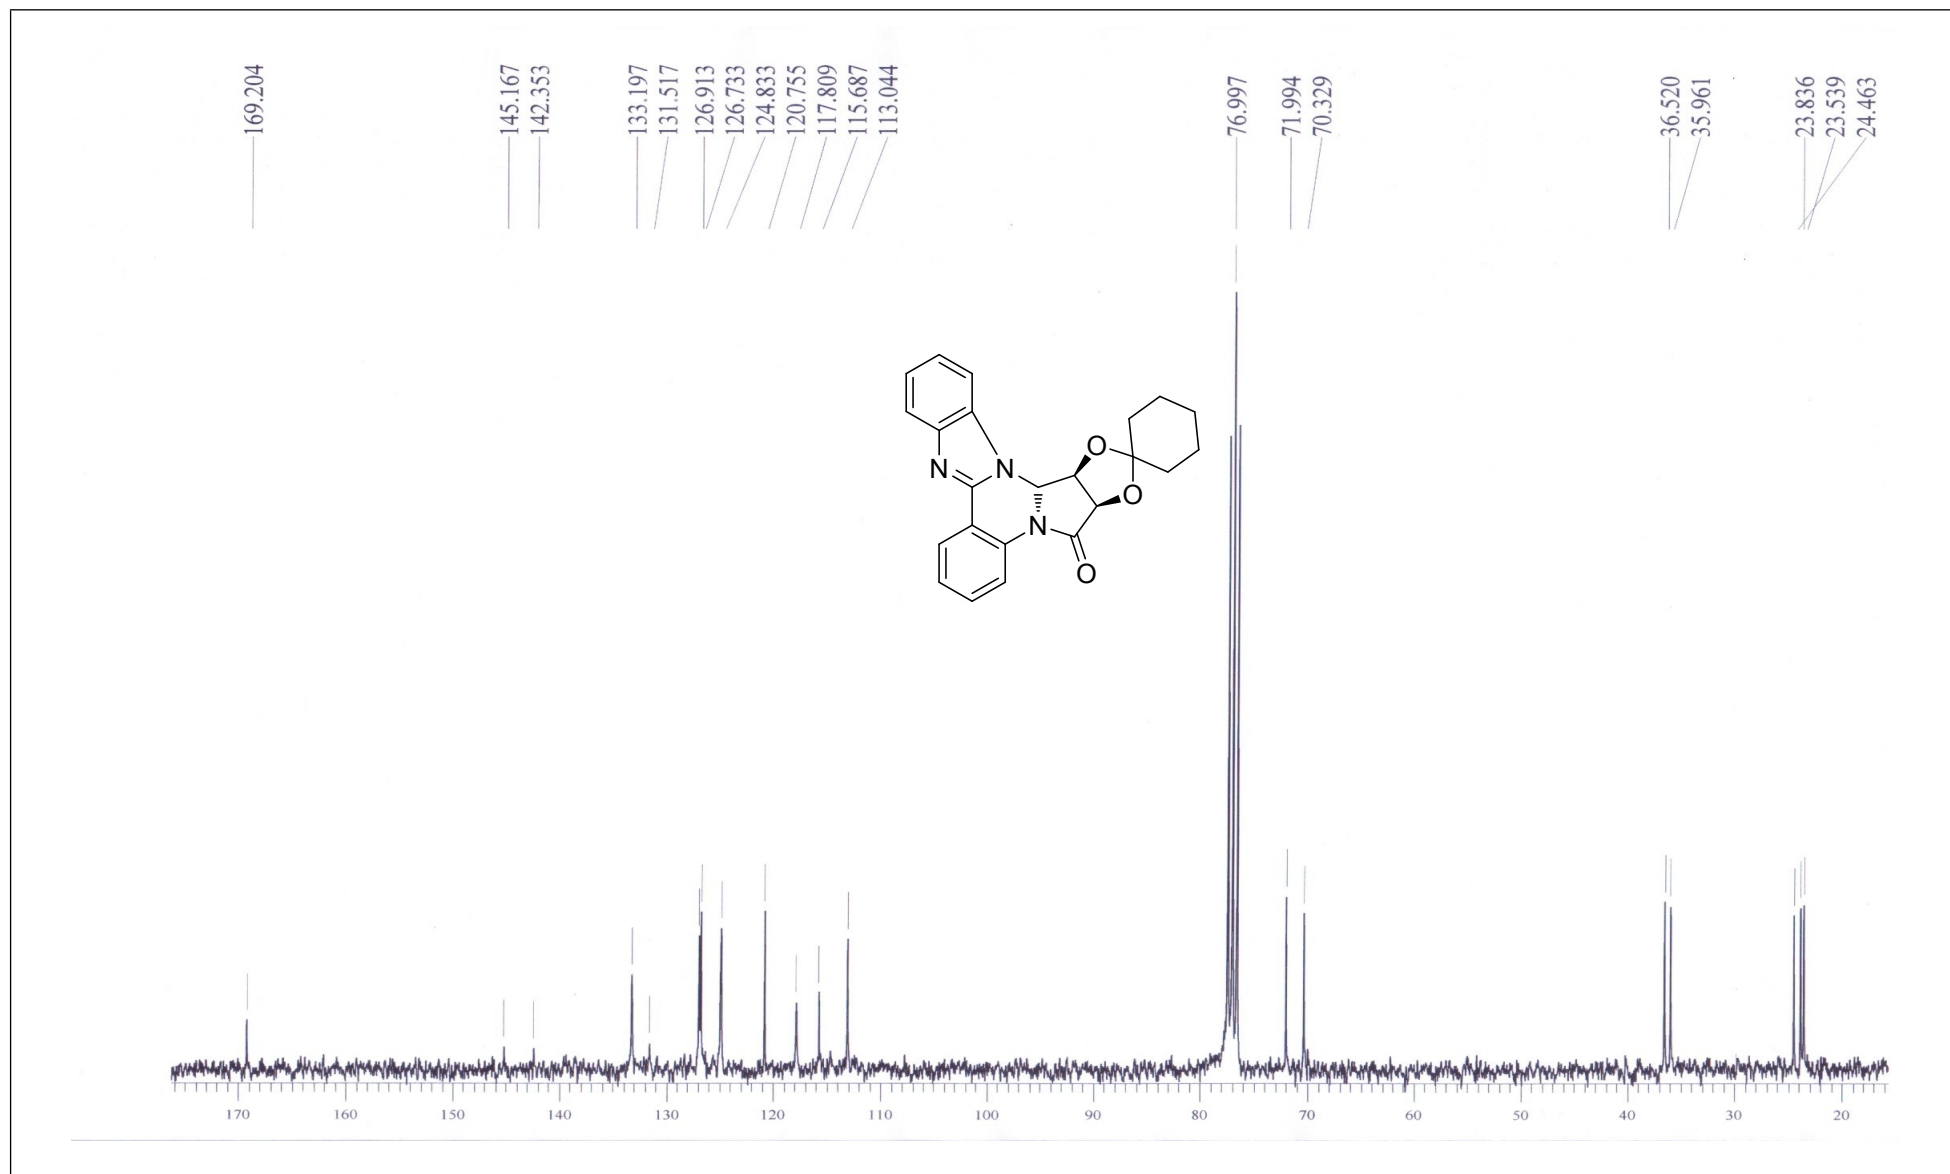

$^1\text{H}$  NMR of Product **3i** (Table 2, entry **i**)

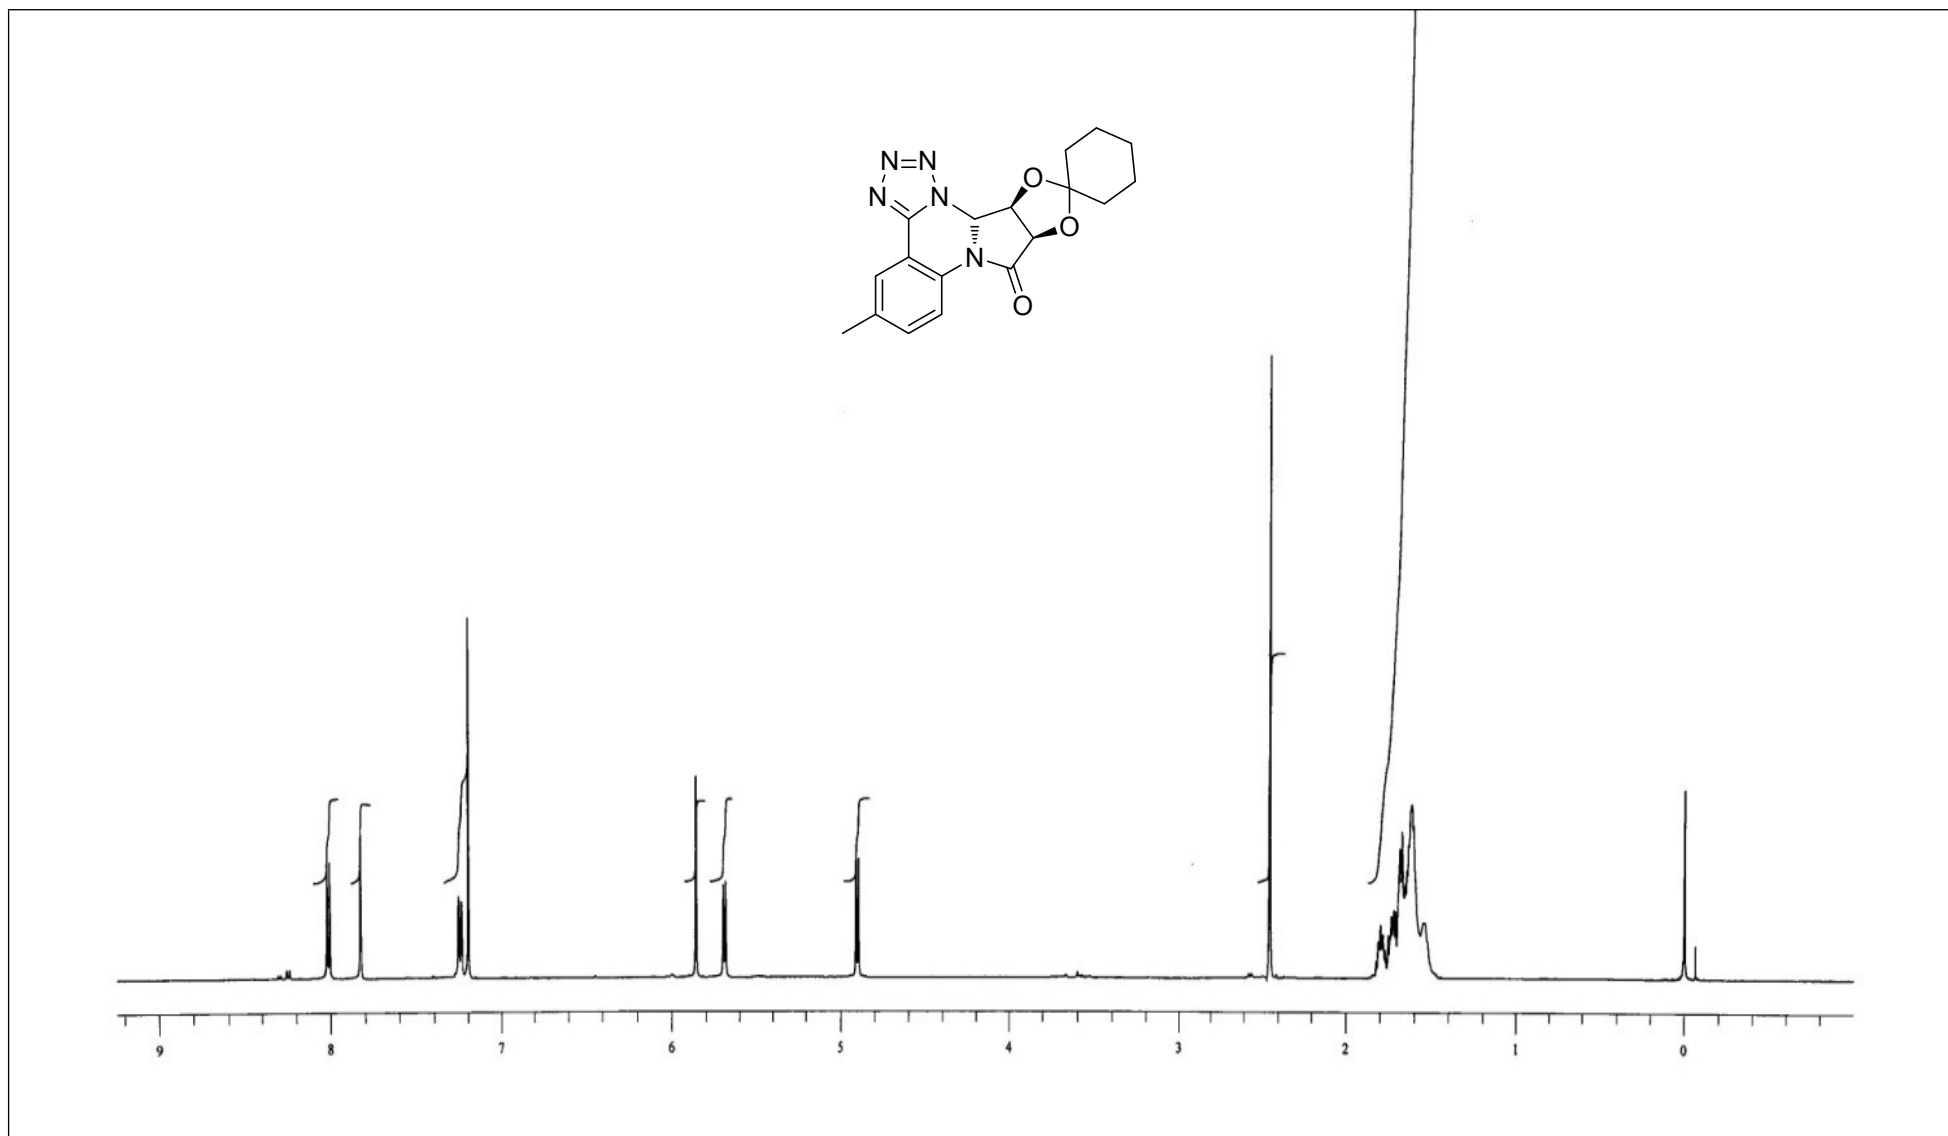

<sup>13</sup>C NMR of Product **3i** (Table 2, entry **i**)

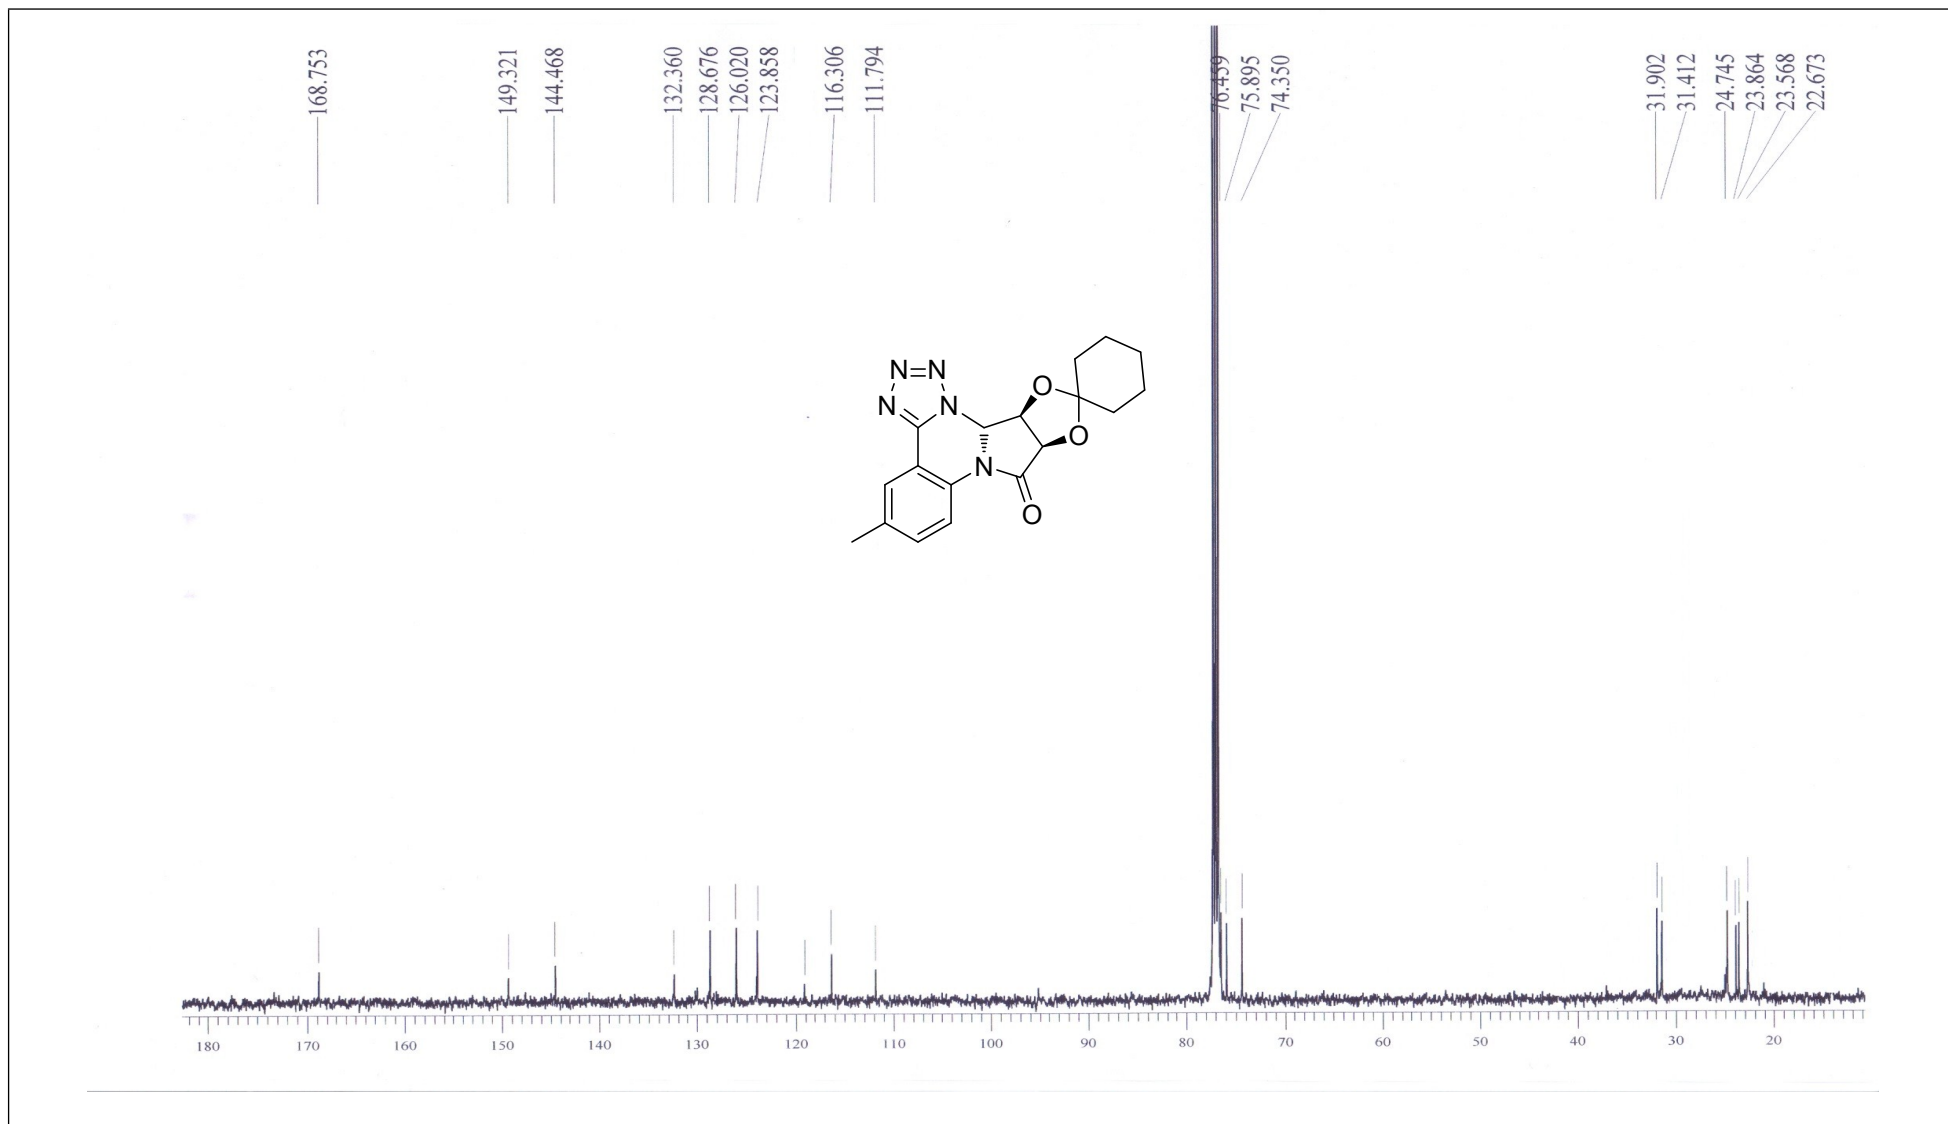

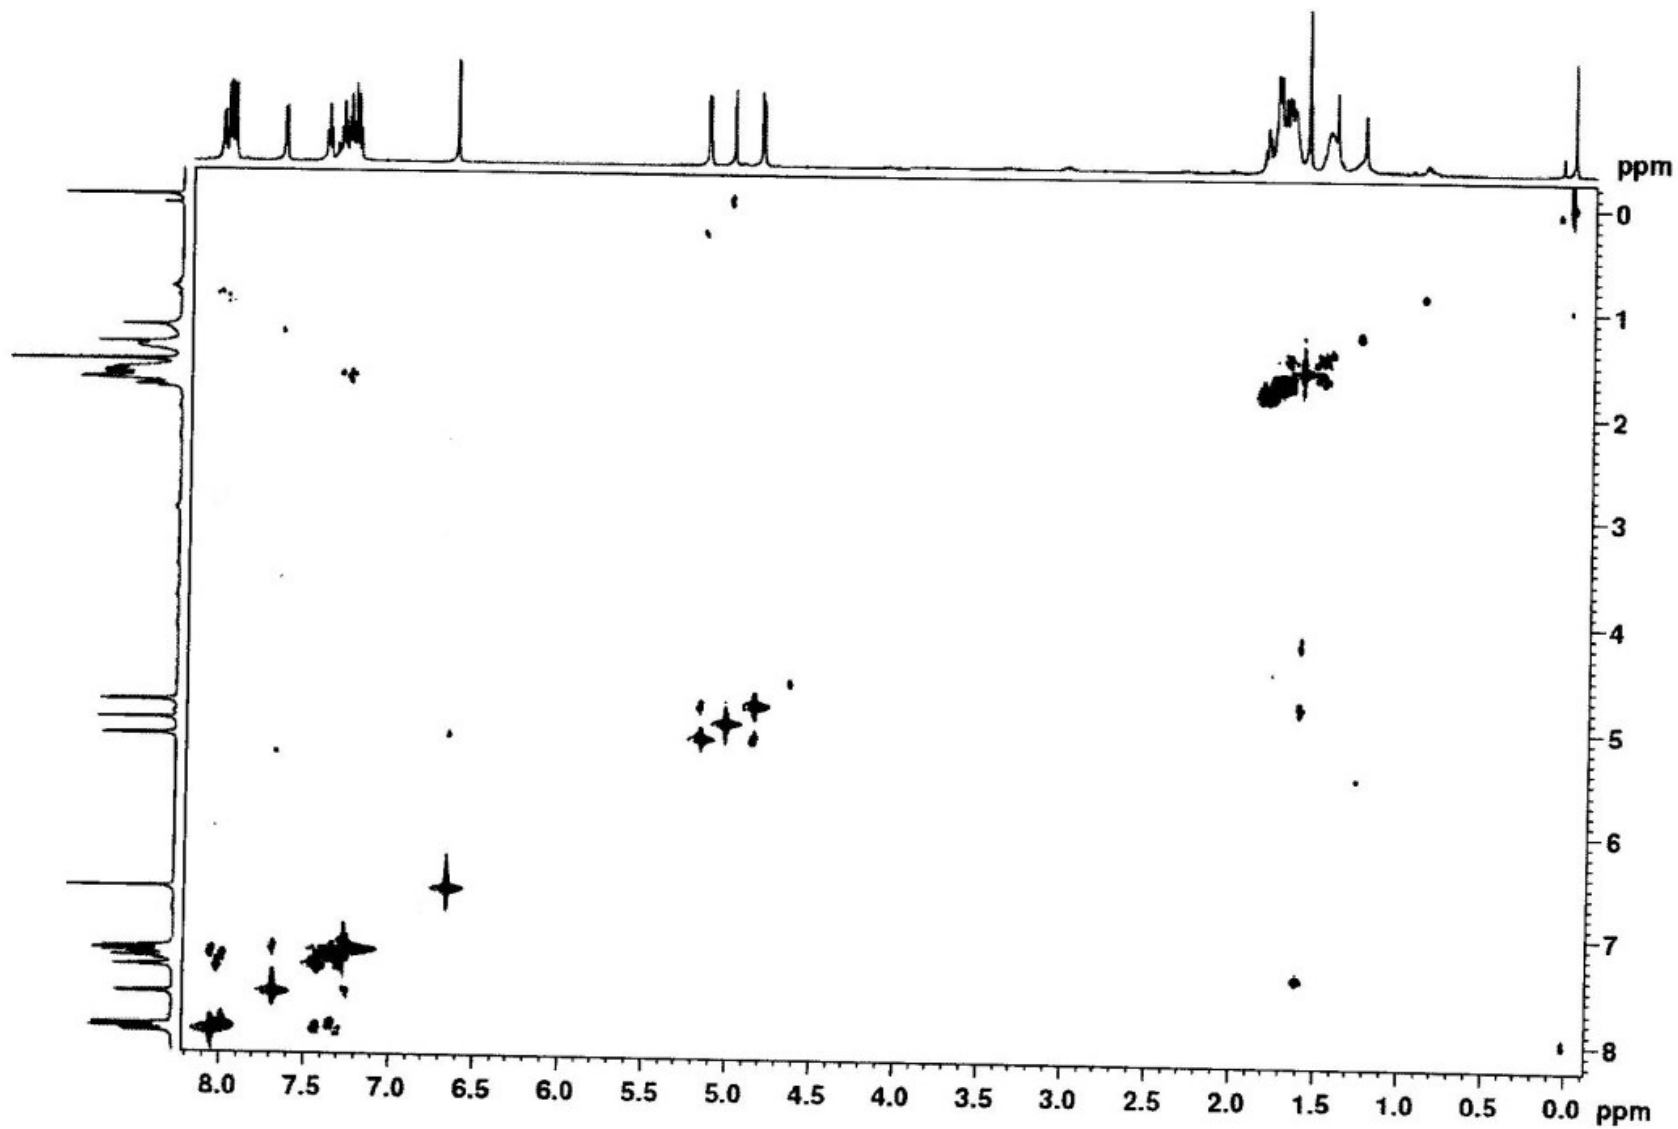

DAF-COSY spectrum of **3a** (Avance 600 MHz, CDCl<sub>3</sub>, 298 K)

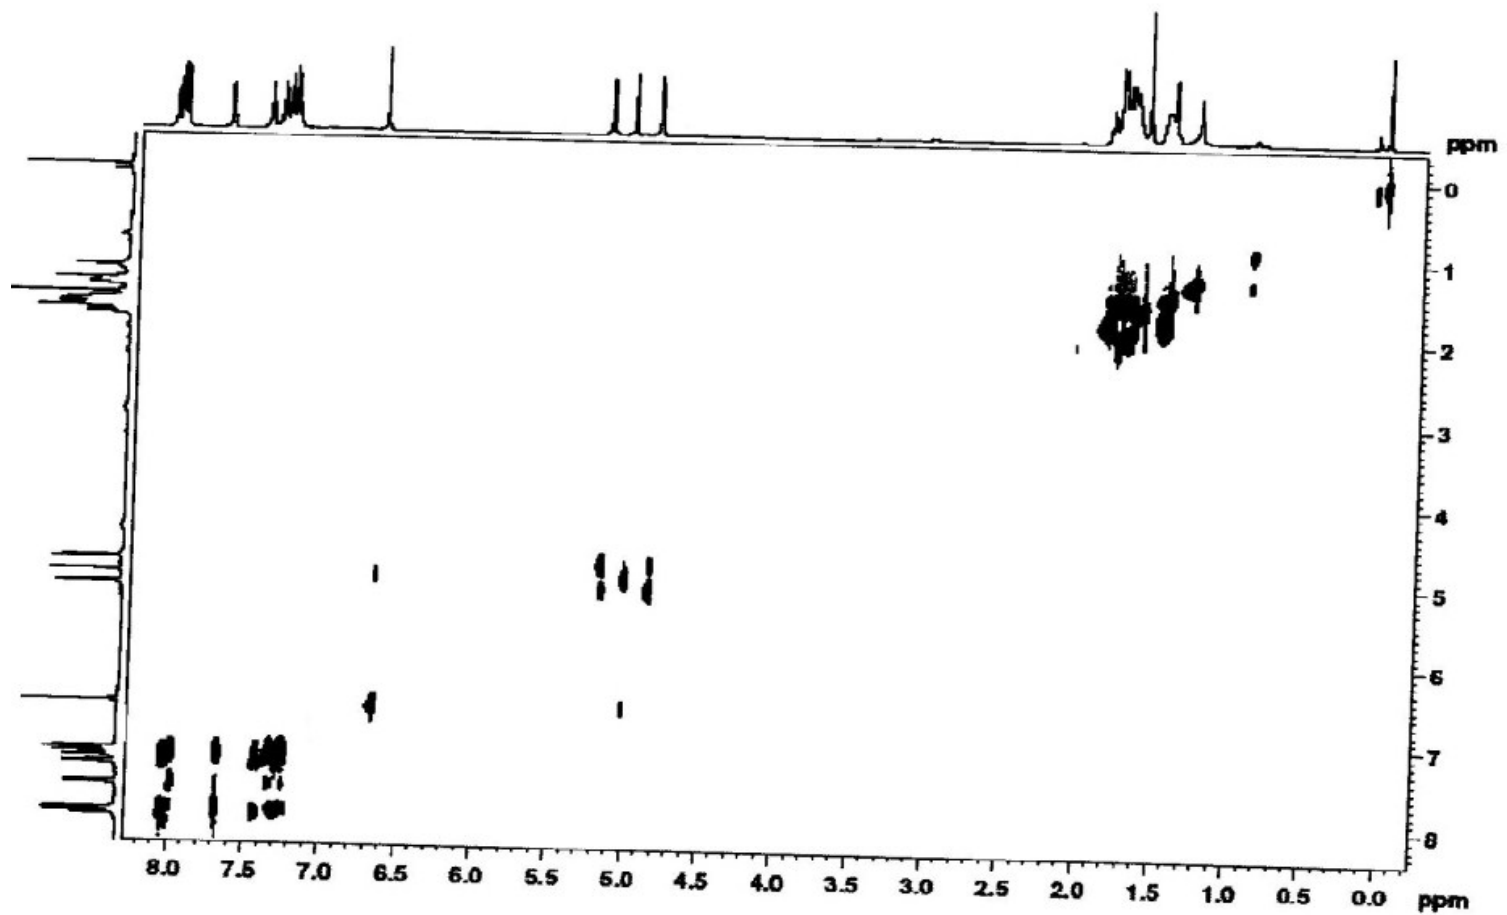

TOCSY spectrum of **3a** (Avance 600 MHz, CDCl<sub>3</sub>, 298 K)

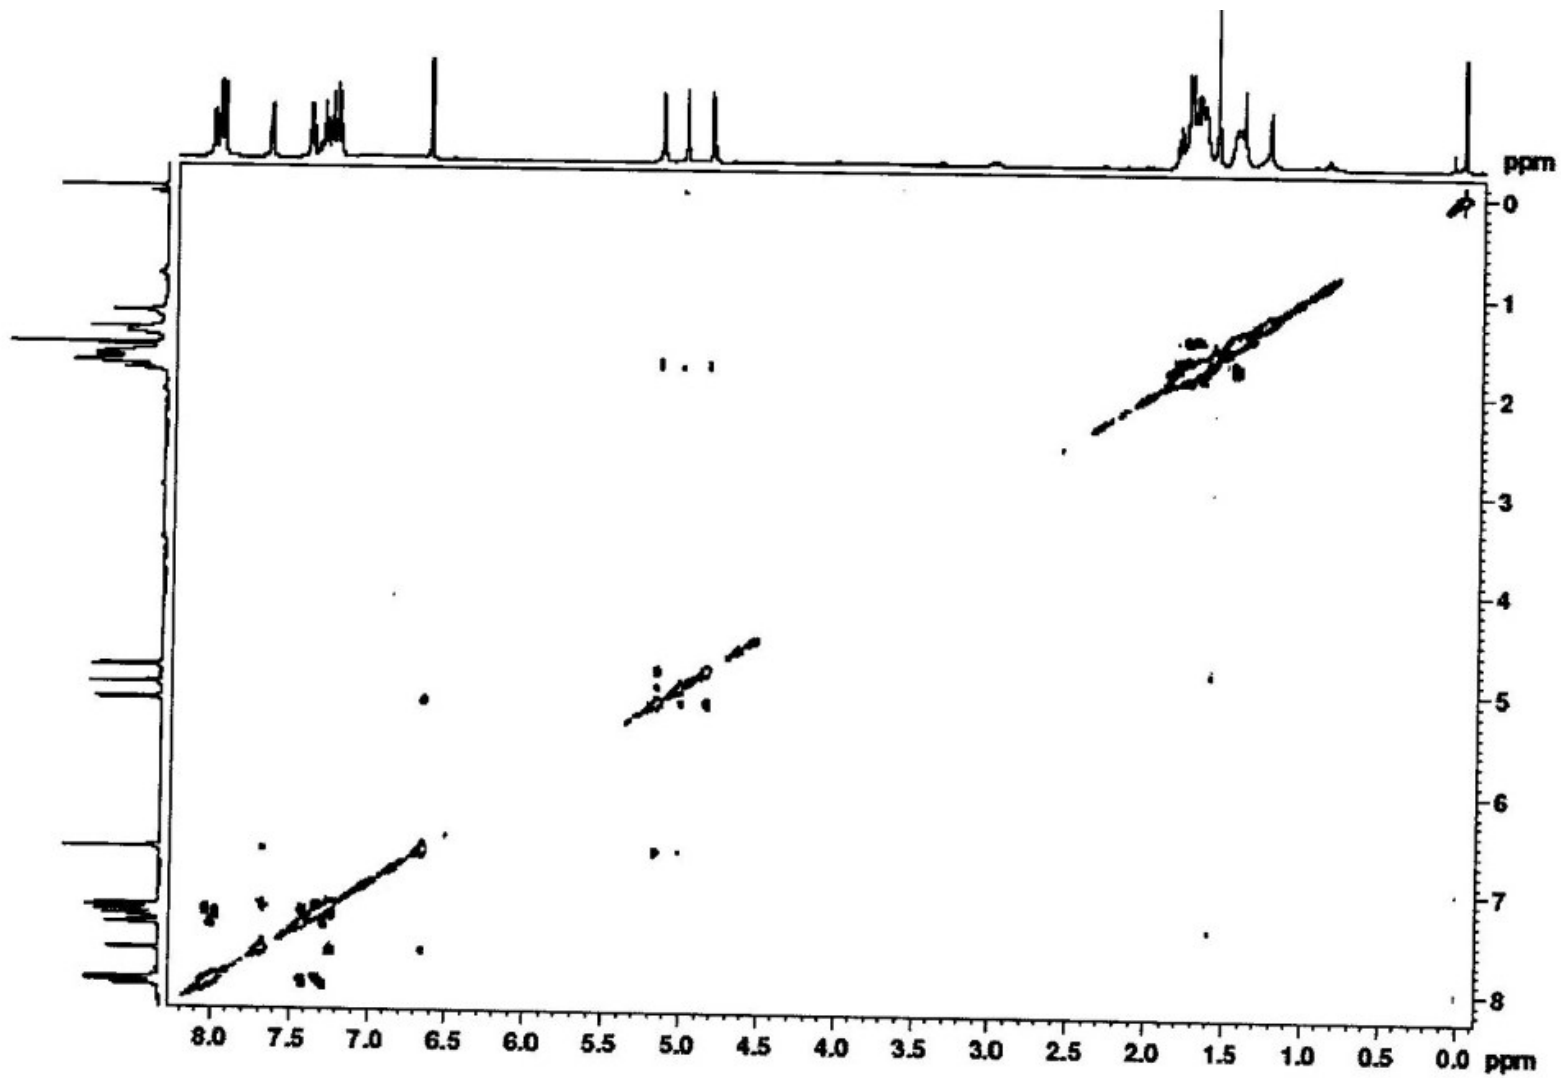

NOESY spectrum of 3a (Avance 600 MHz, CDCl<sub>3</sub>, 298 K)
